# Supplementary material for: Natural diversity of telomere length distributions across 100 Saccharomyces cerevisiae strains
Source: HighWire-hosted journal article supplement (doi:10.1101/gr.281132.125), 2026-01-16
Supplement: Supplemental_Table_S1.xlsx [file Supplemental_Table_S1.xlsx]

## Sheet: Supplemental_Table_S1
Strain	Strain_name	Ploidy	Ecology	Origin	Number_telomere_in_assembly	Sample_accession/Assembly_accession	Number_telomere_reads	AvgQual_telomere_reads	Mean_TL_in_assembly	Mean_TL_in_reads	Median_TL_in_reads	Mode_TL_in_reads	STD_TL_in_reads	CV_TL_in_reads	Skewness_TL_in_reads	Robust_kurtosis_TL_in_reads	ChrI_Left(mean_TL;std_TL;number_reads)	ChrI_Right(mean_TL;std_TL;number_reads)	ChrII_Left(mean_TL;std_TL;number_reads)	ChrII_Right(mean_TL;std_TL;number_reads)	ChrIII_Left(mean_TL;std_TL;number_reads)	ChrIII_Right(mean_TL;std_TL;number_reads)	ChrIV_Left(mean_TL;std_TL;number_reads)	ChrIV_Right(mean_TL;std_TL;number_reads)	ChrV_Left(mean_TL;std_TL;number_reads)	ChrV_Right(mean_TL;std_TL;number_reads)	ChrVI_Left(mean_TL;std_TL;number_reads)	ChrVI_Right(mean_TL;std_TL;number_reads)	ChrVII_Left(mean_TL;std_TL;number_reads)	ChrVII_Right(mean_TL;std_TL;number_reads)	ChrVIII_Left(mean_TL;std_TL;number_reads)	ChrVIII_Right(mean_TL;std_TL;number_reads)	ChrIX_Left(mean_TL;std_TL;number_reads)	ChrIX_Right(mean_TL;std_TL;number_reads)	ChrX_Left(mean_TL;std_TL;number_reads)	ChrX_Right(mean_TL;std_TL;number_reads)	ChrXI_Left(mean_TL;std_TL;number_reads)	ChrXI_Right(mean_TL;std_TL;number_reads)	ChrXII_Left(mean_TL;std_TL;number_reads)	ChrXII_Right(mean_TL;std_TL;number_reads)	ChrXIII_Left(mean_TL;std_TL;number_reads)	ChrXIII_Right(mean_TL;std_TL;number_reads)	ChrXIV_Left(mean_TL;std_TL;number_reads)	ChrXIV_Right(mean_TL;std_TL;number_reads)	ChrXV_Right(mean_TL;std_TL;number_reads)	ChrXV_Left(mean_TL;std_TL;number_reads)	ChrXVI_Left(mean_TL;std_TL;number_reads)	ChrXVI_Right(mean_TL;std_TL;number_reads)	other(Chr_extremity;mean_TL;std_TL;number_reads)
AIC	CBS2807	1	Domesticated	02. Wine European 2	28	CASBKG01;GCA_949124365.1	2179	15.28	237.36	235.97	237	248	54.38	0.23	0.52	4.34	(248.15;59.69;79)	(230.33;49.0;78)	(228.21;50.24;94)	(268.7;46.72;63)	(238.42;46.07;88)	(220.68;52.3;50)	(251.7;39.48;53)	(232.07;41.27;70)	(249.05;43.54;76)	(236.12;40.4;77)	(255.79;67.36;67)	(265.22;47.61;54)	(248.07;47.24;68)	(229.05;77.53;92)			(241.15;46.67;66)	(246.16;49.14;67)	(209.92;37.38;77)	(203.89;35.72;73)	(224.85;48.11;74)		(258.2;48.84;64)	(229.21;56.75;72)	(237.55;48.49;88)	(280.36;47.45;61)	(218.06;45.9;93)	(216.3;46.41;63)	(237.15;50.48;96)	(272.37;65.92;83)		(205.69;49.62;193)
CMF_collapsed	RIB6001	2	Domesticated	16. Asian fermentation	30	CASBOU01;GCA_949125345.1	4072	14.4	409.23	416.11	408	380	99.25	0.24	1.6	6.43	(426.88;82.94;129)	(404.45;72.69;161)		(402.61;86.44;82)	(581.22;153.83;164)	(389.02;142.95;144)			(344.87;55.83;160)	(429.75;74.57;167)	(406.54;97.87;76)	(385.48;73.67;155)	(394.62;65.33;149)	(491.18;87.08;80)	(436.79;86.43;176)	(431.43;83.05;119)	(386.14;76.25;137)	(499.71;157.7;150)	(377.45;81.74;155)	(413.15;79.04;150)	(394.6;71.05;134)	(408.66;67.99;137)	(421.9;75.65;136)	(403.5;69.66;127)	(421.24;79.31;160)	(413.72;93.52;144)		(367.77;63.72;48)	(429.71;81.33;137)	(410.8;66.18;142)	(392.26;78.18;133)	(400.84;77.5;74)	(ChrIV_ChrXIV_Right;382.65;90.59;72)(ChrIV_ChrXIV_Left;397.59;70.52;274)
AMH_1a	EN14S01	2	Wild	28. TW1	32	CASBJZ01;GCA_949124155.1	542	13.81	416.59	406.28	403	394	91.3	0.22	-0.1	5.69	(393.41;58.73;17)	(457.72;83.78;18)	(359.06;26.68;16)	(472.5;49.98;10)	(476.08;50.4;12)	(421.88;94.4;17)	(347.0;67.8;11)	(435.0;78.02;13)	(420.33;83.84;24)	(429.67;101.41;21)	(432.75;108.45;20)	(358.89;48.53;9)	(409.12;60.76;8)	(297.33;80.35;6)	(413.08;63.45;13)	(400.65;102.69;40)	(407.08;41.94;12)	(408.0;80.84;9)	(478.11;88.37;9)	(460.0;65.88;5)	(438.87;129.31;23)	(390.12;96.03;17)			(397.06;96.46;95)	(338.56;115.78;16)	(366.25;27.54;4)	(349.62;54.09;8)	(415.29;85.85;7)	(413.07;72.0;14)	(450.56;43.8;9)	(364.53;47.61;15)	(ChrXII_ChrXI_Right;422.33;54.13;21)(ChrXII_ChrXI_Left;375.39;60.82;23)
BBM_1a	908	2	Domesticated	10. Mexican distillery/agave	32	CASBML01;GCA_949124755.1	2451	14.47	359.12	369.93	365	359	81.84	0.22	-0.02	5.01	(333.97;71.81;88)	(352.29;75.22;98)	(476.07;94.82;75)	(342.36;73.2;72)	(444.02;90.63;80)	(387.74;64.78;61)	(408.21;75.2;81)	(342.92;53.5;73)	(324.53;49.6;51)	(386.05;62.04;81)	(308.72;60.62;109)	(360.1;71.46;83)	(465.4;58.56;65)	(377.06;59.74;82)	(311.81;54.76;79)	(360.74;63.03;58)	(388.22;61.73;69)	(401.74;80.66;61)	(337.23;66.77;57)	(330.57;60.03;104)	(359.0;64.52;85)	(340.11;71.55;70)	(380.1;65.57;90)	(362.96;74.78;79)	(387.58;76.5;93)	(461.29;81.24;48)	(362.07;63.96;95)	(325.47;54.62;73)	(347.29;86.46;78)	(356.88;74.41;95)	(352.54;50.61;48)	(438.7;87.38;70)
APG	VF8_(6)	1	Domesticated	05. Brazilian bioethanol	30	CASBNF01;GCA_949124575.1	23852	13.17	328.6	356.32	348	329	90.23	0.25	0.9	5.56	(297.79;58.81;857)		(445.17;71.38;779)	(382.45;89.71;906)	(397.86;71.08;884)	(260.84;57.9;530)	(356.89;62.34;922)	(333.4;62.26;781)	(360.1;66.3;996)	(322.4;57.68;848)	(303.62;57.35;829)	(312.01;58.71;990)	(399.97;73.66;907)	(484.0;102.06;853)	(299.54;56.75;900)	(423.21;73.65;675)	(642.55;104.01;273)	(259.64;62.25;138)	(349.93;62.86;905)	(287.33;54.37;933)	(335.15;67.37;771)		(310.92;55.89;866)	(354.89;61.28;901)	(343.22;59.33;829)	(407.38;71.57;819)	(340.34;64.02;879)	(312.34;55.65;997)	(457.73;75.74;734)	(383.84;70.75;413)	(312.19;60.99;822)	(354.28;61.35;915)
ASB_collapsed	CBS4255	2	Human	06. Mosaic beer	32	CASBNJ01;GCA_949124545.1	3705	14.47	407.94	427.77	416	382	116.34	0.27	0.32	4.21	(420.0;63.61;66)	(378.79;87.28;154)	(380.5;84.0;132)	(342.23;57.75;97)	(507.85;111.63;132)	(340.64;73.79;96)	(474.55;113.47;31)	(439.0;113.69;146)	(383.08;64.0;143)	(353.55;58.94;51)	(543.64;95.32;122)	(336.65;69.36;124)	(466.51;78.14;122)	(547.08;110.24;119)	(614.84;120.8;89)	(368.42;72.34;133)	(432.95;83.89;106)	(409.62;116.45;262)	(344.49;61.55;121)	(450.73;103.76;102)	(492.39;62.56;71)	(487.63;79.78;113)	(310.02;92.85;122)	(475.42;90.31;130)	(367.02;75.55;109)	(585.74;109.7;123)	(404.48;121.72;111)	(356.91;63.64;58)	(424.85;76.97;137)	(380.34;85.83;186)	(479.85;72.58;131)	(457.86;83.6;66)
CCQ_1a	Ksc2-2B	2	Wild		32	CASBNS01;GCA_949125505.1	948	15.27	423.47	433.1	420	385	110.96	0.26	0.23	4.67	(353.95;69.52;22)	(520.48;68.03;29)	(515.61;71.26;31)	(398.84;81.47;37)	(436.19;86.27;27)	(580.83;133.25;23)	(439.23;53.29;26)	(465.38;99.72;26)	(404.62;126.26;65)	(411.06;61.89;31)	(358.53;50.78;32)	(398.59;47.71;22)	(343.24;57.59;17)	(519.85;156.77;34)	(412.71;59.28;35)	(570.06;105.08;34)			(408.57;135.44;21)	(373.15;67.97;34)			(534.69;117.15;32)	(405.07;66.45;28)	(368.47;64.0;34)	(363.25;44.57;28)	(376.71;107.54;24)	(411.76;57.96;21)	(408.55;64.4;20)	(451.51;111.0;37)	(423.71;68.75;24)	(541.71;108.55;31)	(ChrIX_ChrXI_Left;479.43;70.6;30)(ChrIX_ChrXI_Right;425.5;65.36;26)(ChrXI_ChrIX_Left;327.39;77.49;28)(ChrXI_ChrIX_Right;387.69;62.14;39)
AGA_1a	CBS3012	2	Domesticated	01. Wine European 1	32	CASBKH01;GCA_949124245.1	18184	13.17	326.62	344.78	342	318	69.92	0.2	0.15	4.75	(322.52;55.76;1273)	(373.01;80.29;1093)	(339.14;55.91;548)	(308.51;59.58;407)	(397.46;77.68;588)	(331.08;66.81;618)	(386.24;58.9;518)	(300.55;55.89;518)	(356.8;54.99;487)	(331.7;59.34;573)	(308.99;59.18;567)	(335.32;54.47;610)	(347.56;56.02;514)	(344.89;57.0;399)			(339.59;56.11;500)	(355.0;62.58;533)	(329.96;60.99;521)	(321.0;63.82;412)	(342.06;64.72;528)	(388.8;62.2;537)	(314.06;61.01;494)	(387.32;69.98;507)	(363.53;63.63;512)	(451.06;71.91;487)	(309.92;58.95;442)	(354.58;59.49;460)	(297.5;65.73;303)	(336.73;65.66;502)	(341.15;59.36;537)	(349.36;58.21;528)	(ChrVIII_ChrXVI_Left;291.45;62.97;656)(ChrVIII_ChrXVI_Right;353.71;54.18;1012)
ADI	YJM981_b	1	Human	01. Wine European 1	24	CASBLI01;GCA_949124275.1	2646	14.57	453.17	560.59	517	433	208.29	0.37	0.86	3.84		(414.23;81.81;111)	(788.76;171.0;140)	(484.75;57.07;4)	(1059.64;263.96;107)	(444.12;58.42;48)	(382.75;154.43;4)	(848.62;120.88;88)	(474.28;72.53;58)			(558.48;87.09;105)		(698.7;100.02;158)			(421.45;81.53;108)	(376.98;96.48;42)		(432.81;67.29;129)	(358.28;80.25;223)		(485.19;79.98;69)	(457.35;70.89;62)		(422.56;77.35;264)	(761.43;131.43;150)	(684.51;118.94;203)	(587.73;98.93;221)	(554.99;92.02;81)		(348.88;51.25;99)	(ChrVIII_ChrXVI_Left;491.26;74.14;172)
CPS_collapsed	FTPW4	3	Domesticated	19. African palm wine	31	CASBPD01;GCA_949125785.1	1803	14.49	530.45	506.66	490	406	146.22	0.29	0.61	5.14	(485.12;121.55;118)	(400.03;72.26;67)	(659.89;158.13;76)	(406.35;93.71;20)	(476.69;100.6;42)	(475.0;97.16;3)	(387.11;69.48;62)	(597.02;130.2;56)	(510.93;174.86;14)	(530.6;119.22;20)		(437.33;96.02;86)	(623.61;168.25;46)	(434.6;75.81;48)	(485.69;119.62;39)	(533.67;123.87;55)		(515.35;160.99;71)	(463.65;108.05;123)	(502.56;93.17;27)	(493.06;69.69;33)		(566.42;160.62;12)	(552.68;140.11;56)	(506.8;105.82;25)	(448.36;117.26;119)	(455.0;77.24;75)	(558.71;127.17;49)	(868.5;238.39;26)	(596.61;143.01;75)	(687.75;106.54;20)	(563.94;102.24;187)	(ChrXI_ChrVI_Right;450.48;142.67;23)(ChrXI_ChrVI_Left;411.18;90.88;130)
AEH	CBS7964	1	Domesticated	05. Brazilian bioethanol	29	CASBKS01;GCA_949124265.1	667	14.18	327.69	345.02	340	310	80.89	0.23	-0.04	5.09	(334.05;51.83;40)	(322.41;81.82;27)	(338.04;66.92;25)	(365.2;63.31;15)	(380.96;56.49;23)	(402.91;63.05;34)	(331.85;62.0;26)	(316.2;55.49;20)	(295.5;101.05;14)	(310.6;77.23;20)	(349.58;55.05;33)		(352.65;59.24;17)	(444.5;88.83;18)	(336.76;92.26;25)		(366.86;78.61;21)	(397.65;69.89;17)			(383.55;85.49;29)	(358.84;75.84;31)	(299.04;69.27;23)	(286.06;60.3;48)	(363.7;64.17;20)		(310.56;86.37;25)	(326.71;60.54;17)	(307.0;54.31;23)	(363.5;100.94;22)	(384.24;89.78;34)	(319.3;59.97;20)
AKH_1a	NPA02-1	2	Domesticated	19. African palm wine	28	CASBJX01;GCA_949124285.1	728	12.77	367.36	397.18	390	357	87.56	0.22	0.32	5.82	(394.73;47.49;26)	(368.11;69.39;19)	(379.76;44.18;21)	(335.19;64.07;21)	(432.0;97.06;22)	(330.88;59.59;25)	(352.06;63.51;35)		(386.45;46.66;22)	(358.88;48.93;24)	(402.45;69.51;47)	(395.56;53.12;27)	(557.58;82.42;26)			(362.6;53.48;15)	(372.19;101.15;16)	(386.29;39.1;14)	(440.96;82.94;25)	(345.24;84.28;34)	(390.22;64.12;36)	(456.86;81.44;21)	(375.68;54.2;31)	(444.35;48.92;20)		(399.19;59.04;27)	(388.2;86.14;25)	(463.2;56.6;15)	(465.89;72.4;27)	(472.9;110.69;39)	(366.38;86.55;29)	(327.05;47.56;39)
ALI_collapsed	CLQCA_20-060	2	Wild	09. French Guina human	31	CASBLC01;GCA_949124195.1	819	13.35	206.68	246.74	243	261	56.12	0.23	0.61	4.98	(247.38;56.65;16)	(252.2;67.54;64)	(304.36;25.57;11)	(248.05;65.9;44)	(246.5;49.14;38)			(261.56;39.03;27)					(220.22;42.28;9)	(243.04;47.08;27)	(211.25;48.35;16)	(222.56;35.16;25)		(256.77;62.1;31)		(232.78;53.53;46)	(236.54;44.14;48)	(217.75;63.93;8)	(287.16;39.52;31)	(233.76;42.23;29)	(253.36;36.71;11)	(223.82;34.24;11)	(216.65;44.75;31)	(251.95;57.75;37)	(277.31;56.99;45)	(243.13;63.77;47)	(242.44;47.45;32)	(261.61;53.61;31)	(ChrVI_ChrXIII_Right;228.25;48.03;16)(ChrIII_ChrV_Right;223.6;45.14;35)(ChrIII_ChrV_Left;307.18;43.57;11)(ChrVI_ChrXIII_Left;262.31;67.72;13)(ChrV_ChrX_Left;248.56;50.71;9)(ChrV_ChrX_Right;239.6;44.69;20)
CEI_1a	GE14S01-7B	2	Wild	28. TW1	31	CASBOA01;GCA_949124885.1	508	13.32	358.61	414.19	406.5	389	114.02	0.28	0.23	5.17		(461.33;115.6;18)	(378.77;80.18;13)	(386.89;73.88;18)	(533.2;79.05;15)	(191.07;98.6;15)	(509.14;159.82;22)	(420.57;85.26;14)	(387.06;74.59;17)	(490.42;131.19;12)	(375.88;100.9;16)	(337.5;68.5;12)	(389.11;74.62;19)	(393.65;57.16;20)	(394.46;73.47;13)	(458.83;108.62;18)	(426.35;80.35;20)	(384.1;42.22;20)	(381.0;54.74;15)	(384.67;70.35;9)	(364.56;59.43;18)	(562.5;94.13;20)			(373.76;101.99;25)	(353.3;62.83;10)	(492.0;110.13;20)	(438.89;64.4;9)	(434.29;69.81;14)	(412.44;76.93;16)	(490.45;138.43;11)	(344.9;97.94;10)	(ChrXII_ChrXI_Right;434.93;96.73;27)(ChrXII_ChrXI_Left;361.41;73.1;22)
AMM_1a	SJ5L12	2	Wild	28. TW1	32	CASBKJ01;GCA_949124425.1	812	13.5	579.81	527.29	496	493	198.2	0.38	2.56	7.22	(431.33;74.63;9)	(732.25;170.13;12)	(539.9;145.68;20)	(532.53;102.73;34)	(1036.32;293.26;19)	(553.71;103.09;17)			(527.1;193.62;20)	(456.59;126.58;39)	(456.57;64.36;28)	(654.67;163.58;24)	(517.73;140.28;26)	(375.0;91.22;9)	(499.92;98.32;26)	(450.83;83.28;30)	(479.89;157.52;35)	(452.3;99.92;37)	(494.46;77.0;37)	(494.94;90.21;16)	(597.0;135.01;15)	(422.76;86.8;17)	(392.26;79.06;27)	(593.76;148.54;33)	(497.28;100.63;32)	(573.27;357.55;33)	(448.75;99.05;24)	(624.6;74.48;15)			(450.25;103.12;40)	(438.64;116.52;39)	(ChrIV_ChrXV_Right;646.52;162.41;25)(ChrIV_ChrXV_Left;484.58;94.56;31)(ChrXV_ChrIV_Left;430.12;55.81;25)(ChrXV_ChrIV_Right;1065.56;270.21;18)
AVN_collapsed	CH02	4	Domesticated	08. African beer	32	CASBMP01;GCA_949124485.1	489	14.75	600.72	589.92	579	620	156.43	0.27	0.33	4.66	(694.18;195.2;22)	(470.0;140.15;29)	(693.93;153.78;28)	(640.86;171.37;7)	(695.62;173.57;21)	(487.38;103.32;8)	(682.46;162.26;13)	(600.65;177.86;31)	(549.14;125.88;36)	(489.5;62.84;10)	(582.29;141.12;14)	(700.56;216.06;9)	(644.54;125.74;13)	(554.21;142.83;38)	(616.52;145.18;21)	(432.0;212.62;5)	(573.59;142.72;27)	(454.0;102.66;5)	(537.67;60.06;6)	(554.7;144.81;20)	(642.41;136.01;22)	(761.75;47.54;4)		(425.0;0.0;1)	(515.08;108.36;13)	(572.86;94.75;7)	(568.15;68.59;20)	(571.41;114.3;17)	(612.25;64.66;8)	(361.0;0.0;1)	(574.89;107.5;18)	(594.2;58.4;15)
BLD_1a	DBVPG1608	2	Domesticated	01. Wine European 1	32	CASBMF01;GCA_949124555.1	3963	13.21	373.91	375.02	368	353	93.36	0.25	0.32	4.49	(327.88;52.69;59)	(364.27;86.08;74)	(379.41;78.38;124)	(386.47;65.27;144)	(525.83;100.19;150)	(496.82;90.51;104)	(319.69;61.33;128)	(417.44;60.09;147)	(331.59;57.31;129)	(385.97;76.94;136)	(375.68;62.27;161)	(431.32;87.44;148)	(331.71;71.52;112)	(384.6;79.15;136)	(380.23;79.77;124)	(314.7;59.3;109)	(256.09;53.82;159)	(352.61;76.32;139)	(345.71;67.04;138)	(398.83;92.94;109)	(310.59;62.98;140)	(364.79;57.42;110)	(336.37;56.15;126)	(421.4;70.46;128)	(357.09;68.6;123)	(400.67;74.14;91)	(315.16;64.63;128)	(465.8;69.36;120)	(371.31;65.33;98)	(319.36;69.75;121)	(339.72;64.29;123)	(476.86;87.76;125)
BCE_3a	HE006	1	Human	09. French Guina human	30	CASBMS01;GCA_949124745.1	9696	13.23	312.17	322.66	320	299	74.35	0.23	0.04	5.3	(397.68;64.3;259)		(280.99;57.29;329)		(355.53;60.61;285)	(316.75;71.83;276)	(363.83;72.89;318)	(324.94;61.64;344)	(348.98;73.64;311)	(297.83;56.41;284)			(313.29;60.96;348)	(345.26;49.96;322)	(281.47;64.05;401)	(304.64;57.03;315)	(347.16;66.09;294)	(347.9;71.47;336)	(298.27;64.02;387)	(289.73;68.18;288)	(325.83;70.9;287)	(275.67;57.7;372)	(305.17;64.36;342)	(300.71;58.59;343)			(286.98;62.56;325)	(310.26;65.12;352)	(431.37;88.55;259)	(328.08;61.53;305)	(320.35;58.99;357)	(307.02;67.39;339)	(ChrVI_ChrXIII_Right;316.81;67.75;378)(ChrVI_ChrXIII_Left;347.82;65.81;295)(ChrXIII_ChrIX_Left;303.61;73.97;317)(ChrXIII_ChrIX_Right;371.7;94.67;328)
CFS	UCD_40-255	3	Domesticated	01. Wine European 1	31	CASBOL01;GCA_949125725.1	5806	14.74	550.58	532.81	505	377	188.84	0.35	0.56	4.12	(505.16;212.12;163)	(371.65;69.11;229)	(449.0;174.59;257)	(707.68;174.64;177)	(667.35;128.61;167)		(430.28;111.35;200)	(569.24;130.77;213)	(488.54;120.81;190)	(405.71;77.26;213)	(514.46;98.48;89)	(460.47;167.55;102)	(454.42;154.24;193)	(727.82;212.57;119)	(625.6;139.94;174)	(700.97;235.92;143)	(665.16;229.08;163)	(422.14;97.12;197)	(474.66;103.06;199)	(390.87;93.6;187)	(472.3;134.05;210)	(690.96;140.66;194)	(467.1;169.67;202)	(518.21;203.27;336)	(434.52;114.17;201)	(491.25;93.34;222)	(621.16;200.39;164)	(524.62;193.18;200)	(733.23;159.08;189)	(575.78;111.07;194)	(577.95;126.86;178)	(667.04;294.29;141)
BPK_collapsed	DBVPG1861	2	Wild	01. Wine European 1	29	CASBOC01;GCA_949124965.1	6863	14.79	309.93	328.56	326	342	73.36	0.22	0.27	5.72	(278.17;59.33;291)	(297.27;77.38;231)	(315.94;51.58;100)		(354.18;62.25;205)	(355.73;88.67;232)	(290.22;56.1;255)	(315.1;82.54;236)	(314.65;62.24;281)	(335.84;60.98;290)	(306.39;58.55;122)	(330.87;62.49;277)	(321.09;65.96;372)	(314.17;56.86;271)	(336.4;60.81;250)	(330.83;61.33;293)	(292.15;65.11;91)	(329.82;73.88;177)				(305.75;66.03;252)	(300.62;58.06;227)	(341.89;62.62;359)	(325.26;54.77;158)	(376.65;75.35;271)	(360.26;75.37;230)		(381.33;79.38;232)	(309.41;67.25;246)	(296.22;53.17;116)	(312.93;62.07;165)	(ChrX_ChrII_Right;392.17;105.66;215)(ChrX_ChrII_Left;348.22;68.32;418)
BBL	IMB-53	2	Wild	21. TBD	32	CASBMW01;GCA_949124645.1	345	14.69	417.06	402.46	393	345	88.08	0.22	-0.16	5.91	(457.4;69.65;10)	(355.64;45.71;11)	(399.8;58.84;15)	(320.27;100.69;11)	(446.0;64.24;7)	(449.25;33.53;8)	(363.75;75.9;4)	(418.36;73.34;14)	(454.33;82.76;9)	(436.8;88.21;10)	(394.75;53.77;8)	(420.17;62.49;12)	(492.86;80.57;14)	(423.17;69.95;6)	(476.44;68.87;9)	(381.31;52.6;13)	(351.12;31.61;8)	(463.0;95.26;15)	(389.29;85.13;7)	(413.0;47.21;5)	(387.73;55.94;11)	(390.11;31.19;9)	(391.83;88.45;18)	(389.79;106.91;19)	(438.5;47.47;6)	(338.4;122.25;5)	(313.56;72.43;18)	(345.37;67.09;19)	(523.17;50.86;6)	(395.43;73.29;7)	(389.67;96.53;15)	(400.94;48.63;16)
BMC_2a	UWOPS03-459.1	2	Wild	22. Malaysian	31	CASBMQ01;GCA_949124475.1	798	13.06	195.06	230.3	226	216	54.87	0.24	1.16	5.51	(224.15;47.18;20)	(191.69;41.31;13)	(221.25;38.96;32)	(201.73;38.34;26)	(334.67;85.07;21)	(232.32;64.65;25)	(225.28;43.32;25)	(218.39;43.43;33)	(223.04;40.1;23)	(234.65;50.15;43)	(197.62;40.5;26)	(229.88;48.16;26)					(233.74;68.07;38)	(219.54;39.16;26)					(214.84;37.87;31)	(230.8;43.19;5)			(233.94;39.14;47)		(234.8;45.14;15)	(215.76;37.47;33)	(242.83;78.06;29)	(236.04;46.87;23)	(ChrVII_ChrVIII_ChrX_Left;264.97;47.04;34)(ChrXIII_ChrVII_ChrXI_Right;221.78;62.29;27)(ChrXIII_ChrVII_ChrXI_Left;260.2;41.36;25)(ChrXI_ChrVII_Right;251.67;8.18;3)(ChrX_ChrXIII_Left;239.07;43.09;42)(ChrXI_ChrVII_Left;252.17;67.03;12)(ChrX_ChrXIII_Right;201.7;44.21;37)(ChrVIII_ChrVII_Left;244.5;35.18;18)(ChrVII_ChrVIII_ChrX_Right;197.0;32.34;11)(ChrVIII_ChrVII_Right;227.66;50.85;29)
CFC_collapsed	4.5_WLP530	4	Domesticated	12. Ale beer	25	CASBOS01;GCA_949125035.1	258	13.44	333.88	352.94	347.5	316	92.15	0.26	0.7	6.55	(296.89;89.07;18)		(317.5;86.33;10)	(406.25;80.46;16)	(349.71;83.97;14)	(429.6;174.42;5)	(348.31;89.99;16)	(360.18;89.69;11)	(363.67;29.77;3)	(424.0;51.24;12)	(321.91;59.37;11)	(366.86;152.06;7)	(322.56;32.34;9)	(371.12;83.35;8)	(514.0;242.0;2)	(381.54;81.79;13)	(357.75;59.33;20)	(390.5;47.6;6)	(298.78;74.63;18)		(378.33;71.32;15)		(353.8;96.14;5)		(346.4;60.77;5)	(327.5;92.39;10)	(330.43;63.51;14)			(335.9;71.07;10)
CPA_1a	906	2	Domesticated	10. Mexican distillery/agave	32	CASBOP01;GCA_949124875.1	463	14.99	232.47	302.19	300	312	64.61	0.21	-0.11	5.97	(346.4;77.51;5)	(338.6;38.29;5)	(307.1;48.61;20)	(291.86;35.99;22)	(277.6;45.23;15)	(282.46;39.67;13)	(312.89;56.88;19)	(301.7;38.82;10)	(300.0;87.37;13)	(308.46;66.12;24)	(345.33;55.43;15)	(366.94;85.57;17)	(248.17;32.67;6)	(275.75;33.26;4)	(285.85;36.25;27)	(303.09;34.55;11)	(333.55;66.28;11)	(264.12;72.26;8)	(332.36;28.53;11)	(260.5;68.25;12)	(365.73;63.14;26)	(336.0;0.0;1)	(320.12;59.32;16)		(308.26;38.22;19)	(284.53;69.74;36)	(299.25;27.42;8)	(265.76;33.66;25)	(325.18;90.26;11)	(301.8;67.63;10)	(277.14;53.5;14)	(262.76;58.0;29)
BAP_1a	HN16	2	Wild	23. CHN-V	32	CASBNC01;GCA_949124535.1	690	12.86	258.28	306.12	300.5	296	71.38	0.23	0.11	5.97	(301.84;71.57;19)	(264.69;69.16;13)	(257.31;45.86;13)	(346.48;53.5;23)	(354.74;65.42;23)	(297.67;77.83;27)			(311.0;51.71;21)	(334.27;51.9;11)	(292.83;58.92;23)	(301.63;98.06;19)			(297.23;60.19;26)	(285.73;84.6;30)	(275.35;47.93;17)	(349.8;66.75;25)	(305.81;45.69;16)	(278.56;41.74;36)	(282.96;49.47;26)	(306.67;69.16;18)	(388.76;62.82;17)	(294.0;75.61;29)	(262.39;58.74;23)	(319.52;67.75;31)	(295.83;79.81;24)	(307.16;49.76;19)	(443.36;118.84;11)	(326.96;43.83;27)	(303.89;50.3;9)	(322.64;46.22;25)	(ChrVII_ChrIV_Right;297.62;45.36;24)(ChrIV_ChrVII_Right;280.8;48.72;25)(ChrIV_ChrVII_Left;288.96;73.71;25)(ChrVII_ChrIV_Left;295.8;62.78;15)
ACH	CLIB483_1b	1	Domesticated	04. Cider	32	CASBKV01;GCA_949124295.1	620	14.19	362.31	387.78	377	377	98.91	0.26	0.36	5.16	(366.18;60.35;17)	(344.12;101.49;16)	(476.25;78.5;12)	(347.79;46.33;14)	(450.82;93.79;17)	(358.24;69.1;25)	(355.33;63.62;21)	(398.0;38.1;20)	(330.52;79.98;23)	(392.88;55.99;17)	(287.18;88.16;11)	(321.05;80.62;20)	(534.35;54.9;20)	(334.92;67.7;12)	(542.56;131.2;18)	(448.23;105.89;22)	(408.75;62.54;16)	(354.15;50.73;26)	(314.78;65.25;23)	(357.25;64.01;20)	(514.48;81.3;21)	(411.42;87.54;19)	(372.62;55.16;21)	(317.78;59.93;18)	(379.32;68.42;19)	(316.86;74.44;21)	(378.16;50.57;19)	(335.24;45.63;21)	(373.28;97.41;25)	(499.06;65.41;17)	(376.63;85.41;30)	(440.68;85.24;19)
CBK	1	1	Wild	13. Lab-related	32	CASBOX01;GCA_949125905.1	178	13.42	348.56	403.79	406.5	368	130.58	0.32	-0.51	4.82	(380.5;98.75;6)	(369.25;84.15;4)	(379.5;43.21;8)	(397.5;52.32;6)	(588.6;38.94;5)	(545.5;71.09;4)	(283.67;106.59;3)	(248.25;56.48;4)	(496.75;13.27;4)	(391.5;14.5;2)	(339.0;129.09;7)	(389.1;87.93;10)	(452.7;93.99;10)		(411.67;153.18;9)	(286.0;79.72;6)	(579.83;61.99;6)	(502.12;80.27;8)	(357.86;112.24;7)	(382.0;81.21;6)	(408.8;21.33;5)	(324.89;116.38;9)		(376.33;54.57;3)	(391.08;107.42;13)	(341.0;19.0;2)	(445.5;15.5;2)	(469.17;231.9;6)	(361.33;171.46;6)	(308.0;159.12;4)	(441.14;146.36;7)	(398.67;98.79;6)
AFH	CBS1509	1	Domesticated	16. Asian fermentation	30	CASBKR01;GCA_949124075.1	1946	13.98	263.6	277.5	272	266	66.88	0.24	0.68	4.43	(248.07;52.41;55)		(278.6;47.63;78)	(249.11;60.17;53)	(299.46;89.66;50)	(365.48;56.71;62)	(231.32;42.81;60)	(276.15;50.98;52)	(254.65;46.33;83)	(250.91;57.99;80)	(263.34;60.19;73)	(256.5;48.39;60)			(312.55;62.87;65)	(264.37;59.93;71)	(272.66;40.3;41)	(377.47;57.17;64)	(308.0;70.57;63)	(243.45;51.39;69)	(279.74;63.97;54)	(296.38;63.24;69)	(274.0;54.14;84)	(256.41;65.98;68)	(280.51;64.32;59)	(241.83;61.69;60)	(291.62;60.21;68)	(277.11;53.99;55)	(270.07;56.53;55)	(278.54;94.57;63)	(290.82;44.71;51)	(269.43;54.96;129)	(ChrVII_ChrXVI_Left;288.06;52.83;52)
BTE_collapsed	YS8(E)	4	Domesticated	11. Mixed origin	30	CASBOT01;GCA_949124925.1	828	14.44	301.77	356.89	352	342	76.22	0.21	0.63	5.36	(362.12;61.53;17)	(418.09;106.7;34)	(402.07;70.74;14)	(404.34;98.58;35)	(326.29;52.62;24)	(353.88;89.49;49)	(292.22;69.22;27)	(390.03;61.09;35)	(321.88;55.69;8)	(323.92;52.42;26)	(333.08;54.13;51)	(454.22;78.32;9)	(354.96;72.1;56)	(357.19;47.5;16)		(308.89;47.69;28)	(354.12;68.08;95)		(307.64;34.98;14)	(435.75;43.85;16)	(376.44;60.75;50)	(335.47;51.28;51)	(373.56;94.51;25)	(368.33;37.99;6)	(338.1;73.06;10)	(350.86;57.01;14)	(312.3;43.56;10)	(359.71;58.26;14)	(421.65;68.21;17)	(352.97;67.54;38)	(291.0;50.78;20)	(372.42;40.67;19)
AHG	CBS1586	1	Domesticated	01. Wine European 1	31	CASBKF01;GCA_949124395.1	14835	13.16	310.68	359.34	357	327	76	0.21	0.48	5.21	(315.09;60.13;537)	(318.3;65.44;529)	(350.01;64.95;579)	(349.12;61.95;525)	(433.57;93.04;511)	(336.56;62.23;424)	(360.72;56.52;559)	(394.31;70.48;449)	(341.35;68.44;285)	(364.41;67.18;561)	(340.07;64.42;554)	(392.55;66.22;569)	(342.65;68.16;508)	(357.61;62.0;476)	(378.94;71.74;417)	(362.4;63.57;591)	(385.35;70.36;481)		(308.23;63.84;1083)	(393.85;66.69;1021)	(283.13;59.88;229)	(383.89;78.92;447)	(349.9;68.53;456)	(377.2;87.18;377)	(354.08;81.25;134)	(345.26;64.13;254)	(353.13;65.82;392)	(331.53;71.52;240)	(411.5;72.61;497)	(397.87;82.74;512)	(348.31;64.48;230)	(326.96;66.9;408)
ABA	YJM326_b	1	Human	06. Mosaic beer	29	CASBKX01;GCA_949124355.1	4296	15.26	319.48	343.05	337	306	86.16	0.25	0.47	6.28	(374.69;95.26;161)	(310.45;68.1;159)	(316.88;61.61;156)	(318.58;66.63;124)	(527.95;123.41;130)	(360.25;97.54;169)	(308.71;60.72;86)	(354.17;61.33;151)	(328.67;63.59;165)		(319.12;63.91;139)	(362.31;53.5;16)	(360.74;72.87;102)	(376.58;92.01;163)	(292.77;52.99;164)	(308.32;56.6;140)		(389.17;75.2;168)	(277.46;62.21;158)	(346.24;67.49;163)	(316.2;62.34;164)	(335.31;68.61;181)	(327.18;58.69;166)	(351.62;80.95;196)	(348.88;80.08;173)	(352.28;67.1;136)	(306.78;66.93;143)		(365.7;68.36;125)	(363.97;72.44;207)	(358.45;90.09;184)	(292.17;88.81;107)
BMB	UWOPS03-433.3	2	Wild	22. Malaysian	32	CASBMY01;GCA_949124605.1	1957	14.82	230.22	242.61	238	207	60.63	0.25	0.39	5.34	(235.47;46.81;34)	(219.0;41.51;47)	(230.69;50.47;65)	(224.25;36.19;56)	(302.14;70.82;69)	(266.56;58.74;55)	(231.23;54.99;73)	(200.09;49.87;69)	(239.73;47.6;90)	(235.99;62.64;75)	(210.15;42.71;47)	(260.89;40.87;53)					(253.48;42.94;58)	(306.47;63.74;73)					(223.03;50.58;64)	(272.41;87.95;63)			(222.95;57.21;44)	(230.28;55.85;46)	(274.44;63.65;48)	(239.5;44.16;72)	(224.35;61.55;65)	(245.64;63.22;69)	(ChrVII_ChrVIII_ChrX_Left;234.99;44.43;77)(ChrXIII_ChrVII_ChrXI_Right;248.52;62.97;65)(ChrXIII_ChrVII_ChrXI_Left;251.88;50.74;77)(ChrXI_ChrVII_Right;276.07;77.58;45)(ChrX_ChrXIII_Left;213.52;38.69;64)(ChrXI_ChrVII_Left;253.88;42.41;50)(ChrX_ChrXIII_Right;243.09;60.31;78)(ChrVIII_ChrVII_Left;238.29;64.21;42)(ChrVII_ChrVIII_ChrX_Right;219.69;45.95;48)(ChrVIII_ChrVII_Right;223.09;48.77;76)
CDA	S8BM-32-4D(a)	1	Wild	18. Asian islands	28	CASBOG01;GCA_949125565.1	508	14.34	246.64	276.83	274	274	55.84	0.2	-0.22	5.21	(261.9;43.97;21)	(270.47;39.45;19)	(258.12;80.43;17)	(260.54;64.04;13)	(264.24;41.86;25)		(320.08;44.48;26)	(273.94;49.25;16)	(315.46;42.98;13)	(250.67;69.72;18)	(248.45;83.46;11)	(309.52;59.4;21)	(324.85;42.26;20)	(250.6;47.25;15)	(283.5;49.73;14)	(266.68;48.15;19)	(282.46;53.23;13)	(294.53;46.17;15)	(293.47;54.5;45)		(273.31;36.25;13)	(269.15;43.94;20)	(255.0;49.7;24)	(265.4;44.31;15)	(295.61;59.4;18)	(292.9;38.81;20)	(256.67;44.5;18)	(249.14;35.38;22)				(244.24;40.03;17)
BEM_collapsed	CLIB653	4	Domesticated	08. African beer	31	CASBNR01;GCA_949124795.1	453	14.45	493.61	462.91	432	394	147.05	0.32	1.4	5.84	(593.33;121.74;3)	(456.59;94.03;17)	(415.4;103.75;5)	(389.88;34.57;8)	(638.29;234.98;7)	(375.07;43.97;15)	(389.07;79.06;69)	(428.13;121.92;39)	(381.75;66.25;4)	(403.0;58.94;4)	(402.16;102.01;19)	(544.62;91.56;8)		(381.5;23.5;2)	(427.5;47.5;2)	(402.35;61.14;26)	(530.35;229.65;37)	(588.61;129.5;28)	(481.23;135.96;13)	(442.59;115.11;27)	(458.81;60.83;21)	(418.61;67.47;23)		(434.75;81.26;20)	(538.09;123.81;33)	(1020.0;168.15;3)		(468.4;87.4;5)	(568.57;197.91;7)	(765.25;59.98;4)		(409.25;126.66;4)
AQG_2a	CBS7539	1	Domesticated	06. Mosaic beer	32	CASBNM01;GCA_949124765.1	1656	13.4	353.19	368.75	356	328	111.96	0.3	0.7	5.98	(386.28;85.74;50)	(383.24;55.45;51)	(251.38;59.76;56)	(337.32;60.4;50)	(663.59;95.47;70)	(472.2;115.46;49)	(293.78;75.74;51)	(321.67;52.9;63)	(325.09;41.3;44)	(489.84;87.26;56)	(394.37;50.01;43)	(370.93;70.27;56)	(339.98;61.6;46)	(433.95;118.59;66)	(297.42;54.5;52)	(324.37;67.59;57)	(390.11;64.8;45)	(350.02;63.6;44)	(395.35;76.74;51)	(313.49;44.11;45)	(265.42;42.29;59)	(319.12;79.22;68)	(417.87;43.37;52)	(376.4;78.47;48)	(335.78;50.4;50)	(293.65;66.65;20)	(343.99;67.62;72)	(338.37;63.31;57)	(379.92;65.37;39)	(495.63;84.69;52)	(276.95;39.65;21)	(284.93;54.82;73)
AIF_collapsed	CBS457	2	Domesticated	01. Wine European 1	31	CASBLH01;GCA_949124435.1	6337	13.14	270.32	368.5	363	379	89.64	0.24	1.99	5.34		(376.3;73.6;355)	(355.79;75.86;145)	(338.03;73.08;275)	(453.41;150.58;297)	(330.69;69.92;215)	(381.17;70.5;122)		(391.24;67.37;225)	(347.12;79.14;283)	(400.71;99.68;344)	(361.28;65.23;376)	(317.87;52.9;121)	(321.59;69.75;133)	(379.05;70.08;99)	(387.02;80.94;115)	(451.82;105.0;197)	(379.73;70.34;301)	(307.36;69.52;109)	(313.23;74.68;136)	(356.78;85.08;209)	(357.5;90.78;98)	(344.28;87.01;271)	(366.45;75.14;213)	(391.95;80.72;256)	(346.34;71.23;228)	(365.32;68.76;103)	(348.28;75.64;248)	(355.17;93.18;259)	(529.45;56.84;11)	(377.11;76.06;173)		(ChrXVI_ChrIV_Left;340.9;69.76;248)(ChrXVI_ChrIV_Right;408.62;71.45;172)
AIG	CBS1463	1	Domesticated	06. Mosaic beer	15	CASBKM01;GCA_949124105.1	3469	13.58	302.87	335.69	332	322	81.26	0.24	0.02	6.33	(333.37;69.7;330)		(345.08;74.97;216)		(473.1;96.99;168)			(342.09;77.56;298)		(342.4;71.98;302)	(334.21;73.39;33)	(278.1;94.17;21)	(401.87;91.39;91)		(323.95;73.46;483)			(313.88;67.34;111)	(322.69;62.57;340)		(300.94;66.16;337)		(328.25;71.26;330)					(307.21;59.32;72)			(322.94;72.71;337)
BAI_1a	BJ6	2	Wild	25. Far East Asian	32	CASBMN01;GCA_949124515.1	1453	12.88	348.53	356.59	350	351	80.02	0.22	0.27	4.98	(326.77;78.86;47)	(297.02;77.65;51)	(335.02;49.21;49)	(432.19;62.38;47)	(459.91;118.66;35)	(429.25;72.46;48)	(336.5;62.73;40)	(379.68;51.33;47)	(292.89;83.63;56)	(308.23;50.33;44)	(383.4;92.45;35)	(379.28;66.13;46)	(292.66;51.06;50)	(348.31;52.79;42)	(345.33;58.98;49)	(344.33;59.57;57)	(409.08;68.06;39)	(355.44;63.52;48)	(351.43;69.38;53)	(351.21;52.44;42)	(415.6;68.42;10)	(361.43;65.63;49)	(345.68;66.59;44)	(355.8;67.92;46)	(300.42;39.1;48)	(376.96;60.48;52)	(325.18;66.81;39)	(359.98;78.4;47)	(371.06;73.52;51)	(334.94;50.19;51)	(470.7;82.89;43)	(344.65;59.08;48)
BBT_collapsed	2281	3	Domesticated	17. Spanish	32	CASBNG01;GCA_949124495.1	510	15	353.53	392.44	380	380	89.88	0.23	0.71	5.01	(410.5;54.52;4)	(341.53;80.72;15)	(389.44;85.77;41)	(394.67;25.2;3)	(439.67;97.11;3)	(365.0;74.0;2)	(422.0;66.47;8)	(359.37;82.27;38)	(380.0;0.0;2)	(403.94;101.22;18)	(362.85;56.95;27)	(406.42;82.46;45)	(336.6;58.17;10)	(332.67;29.05;6)	(375.23;71.01;31)	(399.45;78.28;11)	(586.07;74.34;14)	(473.43;83.47;21)	(428.05;93.81;21)	(346.64;62.15;28)	(369.1;46.59;10)	(391.58;46.89;12)	(374.0;7.87;3)	(415.92;94.47;13)	(382.67;28.62;12)	(352.12;57.05;16)	(377.83;98.12;6)	(414.78;122.45;9)	(353.3;65.72;27)	(377.12;67.1;17)	(400.41;68.19;27)	(489.3;122.32;10)
CNB_1a	SM.8.2.C13	1	Domesticated	05. Brazilian bioethanol	31	CASBOV01;GCA_949124905.1	13085	13.24	475.29	498.34	459	386	177.29	0.36	1.12	5.22	(362.13;79.49;590)	(383.07;66.69;552)	(850.81;182.83;262)	(482.82;92.85;436)	(798.82;156.7;315)	(728.21;120.88;315)	(397.05;69.9;482)	(494.76;93.89;496)	(562.53;115.2;379)	(498.39;86.2;448)	(365.54;65.67;604)		(377.75;78.93;551)	(408.94;78.56;324)	(629.8;113.98;348)	(548.57;92.7;294)	(338.24;88.89;644)	(499.79;78.89;462)	(398.75;77.69;487)	(794.88;139.11;303)	(443.8;76.75;453)	(454.28;78.39;423)	(431.25;68.72;454)	(622.66;89.28;399)	(437.1;75.85;288)	(1011.6;187.03;283)	(407.62;69.66;480)	(370.43;78.21;429)	(548.27;71.65;424)	(501.7;85.22;436)	(742.97;114.69;288)	(488.58;86.31;436)
CHS_3a	SC_32_F._Dromer_IP	1	Human	14. European clinical	29	CASBON01;GCA_949125775.1	544	13.2	258	299.97	299	279	73.83	0.25	0.02	5.88	(357.6;52.8;5)	(238.69;75.18;26)	(314.11;52.6;19)	(262.21;50.19;19)	(291.69;59.71;13)	(283.1;56.27;20)	(323.92;87.09;13)	(302.33;61.13;21)	(280.91;67.45;23)	(292.57;47.45;14)	(301.5;65.7;14)	(297.61;56.87;23)			(281.71;53.03;24)	(313.09;114.84;11)		(359.9;93.9;21)	(268.26;69.68;19)	(298.14;56.21;14)		(375.08;70.0;12)	(334.11;87.61;18)	(327.15;66.58;20)	(259.16;78.45;19)	(292.14;56.38;21)			(321.86;39.6;21)	(272.95;47.18;39)	(364.74;93.51;19)	(343.62;62.45;21)	(ChrVII_ChrXIV_Left;294.24;31.41;17)(ChrXIV_ChrVII_Right;303.0;55.43;13)(ChrVII_ChrXIV_Right;278.44;74.43;25)
AIS_collapsed	MC9	2	Domesticated	02. Wine European 2	32	CASBKL01;GCA_949124255.1	3762	15.38	292.53	331.18	328	327	70.32	0.21	0.62	5.46	(284.41;57.5;249)	(317.47;53.48;147)	(341.41;56.07;179)	(357.89;68.05;63)	(355.08;70.54;76)	(323.75;47.2;71)	(314.08;60.7;65)	(315.74;58.0;133)	(301.02;63.05;124)	(360.5;45.5;2)	(338.09;61.99;152)	(333.4;56.37;139)	(315.77;91.6;108)	(443.08;56.25;50)	(345.17;61.51;133)	(367.27;43.85;56)	(295.94;55.24;145)	(318.11;54.14;149)	(326.54;71.46;52)	(375.85;55.52;127)	(305.99;55.88;144)	(316.63;45.23;108)	(315.81;54.02;70)	(373.16;115.46;116)	(339.13;53.71;141)	(320.46;47.23;37)	(284.81;56.13;150)	(376.07;84.29;245)	(342.78;50.36;92)	(355.5;79.3;136)	(341.03;57.86;144)	(325.0;56.56;159)
CEL_1a	JCM_3529-7B	2	Domesticated	16. Asian fermentation	32	CASBOJ01;GCA_949125365.1	1033	12.71	199.94	225.71	223	252	50.87	0.23	0.73	5.45	(205.95;52.98;22)	(205.35;38.68;40)	(217.78;47.16;37)	(244.63;36.02;38)	(225.88;85.86;34)	(225.59;47.5;34)	(205.97;48.58;31)	(226.7;50.95;44)	(205.17;38.24;42)	(199.04;53.17;26)	(258.41;48.68;27)	(205.85;45.19;33)	(225.75;65.98;32)	(250.83;39.74;24)	(259.19;44.86;37)	(214.77;44.63;35)	(246.21;49.45;28)	(229.0;43.49;42)	(247.42;67.53;26)	(223.79;48.54;19)	(214.65;44.28;23)	(238.74;47.89;35)	(226.43;38.39;35)	(211.65;31.09;49)	(256.18;46.34;28)	(231.21;41.8;28)	(225.52;35.74;25)	(246.23;52.36;30)	(211.14;44.67;35)	(216.18;51.89;33)	(211.26;43.67;31)	(230.17;40.23;30)
CRB_1a	SC2-37	2	Domesticated	01. Wine European 1	31	CASBOQ01;GCA_949125755.1	4595	13.2	325.77	343.5	340	323	78.75	0.23	0.04	4.91	(397.41;72.14;139)	(331.21;61.93;142)	(362.34;63.85;143)	(334.79;55.32;144)	(454.24;70.11;140)	(246.28;64.21;175)	(275.41;46.53;122)	(329.14;72.18;139)	(426.79;83.43;148)	(361.37;72.43;137)	(340.37;56.26;145)	(397.74;74.02;131)	(275.22;59.3;139)	(334.24;56.02;142)			(297.85;59.8;142)	(326.9;72.76;141)	(353.52;56.82;177)	(356.74;72.0;144)	(295.31;54.44;120)	(336.91;62.49;177)	(342.49;60.52;165)	(383.36;61.58;161)	(447.18;65.63;167)	(305.31;54.59;142)	(303.67;54.44;126)	(328.17;65.43;90)	(373.23;62.02;142)	(287.81;56.86;107)		(356.93;55.46;150)	(ChrVIII_ChrXVI_Left;319.66;55.99;294)(ChrVIII_ChrXVI_Right;350.18;58.77;164)
CDG_1a	N3.00-7A	2	Domesticated	21. TBD	26	CASBOM01;GCA_949126065.1	288	12.97	212	309.94	300	249	85.68	0.28	0.9	4.77	(295.23;81.65;43)	(266.67;38.35;3)		(311.67;54.84;3)	(353.0;0.0;1)		(297.21;73.83;38)		(281.39;73.12;33)	(302.0;79.23;3)		(295.0;19.0;2)	(418.5;148.53;4)	(246.0;17.0;2)	(244.67;59.57;3)	(305.83;51.92;6)	(337.44;69.78;27)			(353.5;106.5;2)	(298.74;60.06;42)	(375.67;217.03;3)	(348.11;108.61;9)		(447.0;133.0;2)		(344.25;98.55;4)	(259.0;69.0;2)	(353.19;71.07;21)		(315.25;91.52;32)	(250.33;62.23;3)
BDM_1a	MAJ_A	2	Wild		32	CASBND01;GCA_949124785.1	2025	12.71	287.72	306.99	298	309	89.88	0.29	0.6	4.55	(307.65;61.87;68)	(266.63;61.56;103)	(201.02;45.83;50)	(219.31;50.23;48)	(444.6;90.66;60)	(328.46;65.48;71)	(273.95;57.17;66)	(274.64;77.79;84)	(409.09;64.76;56)	(344.29;94.96;42)	(265.13;49.37;70)	(363.84;67.41;74)	(255.02;53.61;65)	(292.68;49.34;75)	(310.51;56.1;70)	(273.65;60.9;69)		(273.5;51.45;82)	(285.66;57.44;74)	(416.42;108.86;48)	(317.8;61.09;54)	(249.35;40.5;26)	(465.24;90.37;66)	(263.25;61.56;125)	(315.07;77.14;59)	(240.11;56.02;74)	(264.02;53.69;52)	(429.48;76.64;50)	(312.0;97.27;55)	(322.18;56.56;74)	(307.56;49.6;78)	(329.54;59.05;37)
AVI_1a	YPS163	2	Wild	20. American	32	CASBMI01;GCA_949124835.1	1102	12.67	261.16	296.22	296	301	59.41	0.2	-0.23	5.03	(272.7;63.97;40)	(279.11;51.59;18)	(291.5;42.5;2)	(319.82;53.23;51)	(342.03;43.59;32)	(294.03;57.29;33)	(337.5;60.06;44)	(280.53;42.02;43)	(284.53;48.73;32)	(292.93;81.06;14)	(285.43;44.16;44)	(307.02;57.15;40)	(272.97;42.05;35)	(281.06;38.63;33)	(288.84;44.3;25)	(307.1;63.3;30)	(347.72;42.71;39)	(295.91;61.18;22)	(277.89;51.32;28)	(283.06;59.56;50)	(323.71;57.89;31)	(294.6;59.41;52)	(263.35;54.33;48)	(313.81;60.75;37)	(294.43;68.72;42)	(281.03;41.48;34)	(272.0;44.57;47)	(265.7;48.7;27)	(342.38;65.22;29)	(319.37;40.68;35)	(283.71;82.74;34)	(273.87;35.16;31)
BAK_1a	BJ20	2	Wild	25. Far East Asian	32	CASBMR01;GCA_949124465.1	2940	14.45	302.69	315.34	315	313	64.04	0.2	0.01	5.54	(328.0;55.91;103)	(301.03;55.55;100)	(294.5;61.81;88)	(297.66;62.55;107)	(357.32;92.23;88)	(359.61;70.72;88)	(304.45;62.15;91)	(312.8;43.65;94)	(290.44;58.79;112)	(299.34;55.47;93)	(344.14;45.94;87)	(336.65;82.0;104)	(326.88;58.61;89)	(319.0;57.27;87)	(319.35;50.04;94)	(325.02;61.89;100)	(290.77;63.24;84)	(283.94;66.62;85)	(318.47;54.43;86)	(296.69;56.17;98)	(337.46;60.41;87)	(303.99;59.62;75)	(273.19;48.78;105)	(340.39;68.81;97)	(334.28;65.51;83)	(317.97;45.67;100)	(318.3;60.1;93)	(324.2;52.82;96)	(327.35;45.9;86)	(307.82;64.59;77)	(299.12;63.17;73)	(307.97;68.36;90)
CDN_1a	UCD_61-190-6A	2	Wild	20. American	32	CASBNZ01;GCA_949125275.1	2863	15.26	367.19	365.37	342	328	124.22	0.34	1.17	5.8	(294.53;56.18;138)	(349.79;73.89;216)	(512.57;97.28;82)	(302.18;49.64;49)	(498.05;200.85;124)	(376.19;98.77;149)	(366.61;61.83;84)	(261.24;49.65;90)	(270.68;63.01;50)	(721.78;159.24;54)	(300.68;60.63;103)	(280.85;65.14;89)	(312.4;56.72;104)	(410.89;66.86;89)	(334.69;47.62;94)	(383.54;80.62;65)	(311.47;66.09;87)	(337.21;54.58;104)	(478.01;82.66;74)	(365.95;54.81;40)	(425.3;79.13;80)	(558.85;118.14;84)	(324.43;63.53;74)	(312.59;62.86;97)	(357.97;77.72;96)	(307.81;55.73;112)		(297.49;60.25;91)	(313.88;57.42;96)	(514.14;100.84;85)	(375.74;96.86;65)	(258.48;50.14;98)
BAG_1a	SX1	2	Wild	26. CHN-II	32	CASBME01;GCA_949124825.1	954	12.87	227.94	291.16	291	296	55.51	0.19	-0.12	4.69	(315.33;46.04;33)	(297.71;52.39;14)	(267.29;49.26;35)	(277.69;48.48;32)	(299.17;57.14;30)	(312.09;43.44;35)	(286.54;36.66;26)	(277.47;41.27;38)	(277.97;41.0;33)	(325.21;49.9;28)	(266.65;46.73;40)	(309.05;50.16;22)	(294.28;50.34;43)	(267.61;48.41;38)	(268.21;41.98;29)	(314.12;50.27;24)					(303.16;46.65;32)	(288.17;84.93;23)	(273.03;63.31;31)	(366.22;57.26;32)	(278.96;51.17;27)	(292.19;45.96;32)	(293.3;48.0;33)	(269.55;44.5;31)	(272.66;62.57;29)	(306.0;43.39;25)	(297.19;63.3;27)	(298.72;30.95;25)	(ChrIX_ChrX_Left;283.22;71.36;23)(ChrX_ChrIX_Right;267.7;41.81;37)(ChrX_ChrIX_Left;295.17;65.6;23)(ChrIX_ChrX_Right;312.0;51.0;24)
BAD_collapsed	DJ71	3	Domesticated	19. African palm wine	30	CASBOY01;GCA_949125245.1	227	13.38	560.13	595.91	583	477	161.42	0.27	-0.07	5.38	(572.8;76.68;15)	(563.5;21.5;2)	(507.5;44.5;2)	(645.67;58.89;3)	(606.0;143.05;10)	(492.2;91.41;5)	(523.4;79.94;10)	(632.5;150.68;4)	(592.0;66.38;9)	(706.6;168.03;5)	(601.36;85.61;11)		(617.0;59.0;2)	(719.0;186.0;2)	(576.82;133.45;11)		(668.0;89.0;2)	(548.82;116.43;11)	(630.17;62.12;6)	(784.0;134.06;16)	(479.89;184.97;19)	(507.2;83.4;10)	(668.0;226.32;10)	(698.7;221.47;10)	(879.0;52.9;3)	(599.78;97.45;9)		(465.42;149.15;19)			(603.6;109.54;5)	(648.25;97.15;16)
CCT_1a	S11F3-6B	2	Wild	18. Asian islands	31	CASBOW01;GCA_949125495.1	601	13.07	435	492.29	481	458	136.32	0.28	-0.08	4.38	(440.61;88.24;23)	(450.82;74.42;28)	(445.45;79.11;22)	(501.93;183.18;15)	(550.42;165.74;24)	(433.07;76.8;14)	(595.58;121.23;12)	(468.76;118.89;25)	(454.95;103.11;21)	(483.64;118.78;25)	(431.55;72.62;20)	(501.96;124.43;25)	(539.87;86.55;23)	(393.52;79.86;25)	(420.48;100.15;27)	(619.21;83.62;14)	(408.67;106.3;24)	(585.54;126.9;13)	(543.08;122.13;12)		(416.88;57.63;16)	(523.11;124.13;19)	(620.17;91.78;12)	(771.5;74.43;12)	(532.11;148.62;19)	(409.8;70.6;15)	(534.52;152.99;25)	(492.14;141.95;14)	(566.77;108.92;13)	(639.06;172.24;18)	(452.8;73.02;20)	(417.46;99.58;26)
BBF_collapsed	CCY_21-4-102	2	Wild	11. Mixed origin	31	CASBNQ01;GCA_949124735.1	1588	14.51	300.42	367.39	363	363	75.49	0.21	0.17	5.48	(449.83;68.65;41)	(424.39;80.38;51)	(340.3;49.6;66)	(354.68;74.46;22)	(344.04;76.82;74)	(341.87;65.03;53)	(350.06;48.94;48)	(358.87;51.84;104)	(374.12;74.18;40)	(415.35;63.3;40)	(400.9;107.53;60)	(331.9;63.62;48)	(344.6;58.88;83)	(405.94;63.75;52)	(358.85;57.3;34)	(361.74;57.02;27)	(334.57;61.49;87)	(394.83;66.14;52)		(368.26;52.66;47)	(392.49;75.92;41)	(409.94;75.9;34)	(318.63;56.11;43)	(357.85;72.18;97)	(405.66;67.82;65)	(320.61;63.43;31)	(366.51;47.74;35)	(338.95;56.34;64)	(415.43;111.17;58)	(343.34;57.53;47)	(332.76;71.91;21)	(377.7;66.0;23)
BGN_3a	CLIB561	1	Domesticated	07. French dairy	29	CASBMX01;GCA_949124675.1	878	13.31	685.76	691.88	681.5	608	228.45	0.33	0.41	4.56	(774.45;105.08;33)	(504.81;73.9;26)	(624.47;181.5;32)	(880.15;203.43;26)	(707.43;157.41;28)	(652.68;106.95;34)	(688.42;166.0;43)	(1003.93;132.46;30)	(692.58;224.58;26)	(559.48;91.87;27)	(737.45;151.33;33)	(773.92;203.4;25)	(1027.56;380.31;27)	(497.86;109.82;29)	(876.15;236.08;33)	(628.97;123.85;35)	(1089.56;279.13;18)	(530.45;132.9;29)			(579.67;217.13;24)	(472.08;125.13;26)	(636.67;155.16;39)	(712.0;170.03;23)	(786.66;177.86;35)	(555.95;126.98;41)	(665.93;170.99;28)		(793.83;238.36;29)	(647.19;165.59;53)	(570.54;137.55;26)	(538.95;116.68;20)
AGK	CBS2361	1	Wild	11. Mixed origin	31	CASBLA01;GCA_949124045.1	424	13.26	260.58	308.29	301.5	312	76.21	0.25	0.38	4.24	(260.29;57.16;7)	(329.07;74.35;14)	(475.3;43.9;10)	(326.21;61.62;19)	(311.5;74.78;20)	(291.0;78.15;13)	(350.23;63.1;13)	(261.46;65.54;13)	(269.33;39.0;21)	(281.38;57.87;16)	(257.95;48.43;22)	(349.0;38.09;16)	(310.18;71.3;11)	(289.11;59.15;9)		(306.12;67.34;17)	(298.37;43.91;19)	(341.31;37.52;13)	(297.81;52.14;16)	(304.57;90.47;14)	(405.17;90.26;18)	(295.0;52.49;14)	(341.58;78.71;12)	(290.0;56.87;21)	(341.6;68.86;15)	(283.3;99.92;10)	(332.91;43.18;11)	(240.45;41.63;11)	(281.46;46.67;13)	(254.4;44.82;15)	(250.0;0.0;1)
ADE	PW5_b	1	Domesticated	10. Mexican distillery/agave	32	CASBKC01;GCA_949124235.1	3089	14.43	386.44	390.63	385	353	99.48	0.25	4.79	4.56	(455.88;60.51;97)	(476.02;77.82;65)	(390.95;72.53;113)	(368.89;69.63;92)	(422.38;283.12;79)	(417.94;88.0;93)	(369.99;76.1;92)	(438.76;64.04;98)	(312.46;58.03;112)	(326.55;59.06;99)	(333.11;58.16;87)	(359.67;72.67;114)	(409.55;56.74;96)	(469.98;69.45;94)	(506.33;84.58;97)	(432.44;67.53;55)	(464.49;98.36;85)	(377.24;73.95;109)	(368.33;63.96;87)	(412.29;66.82;90)	(329.25;65.13;118)	(362.21;81.03;73)	(356.67;67.86;115)	(515.26;75.58;82)	(366.98;71.89;124)	(352.8;54.99;135)	(503.35;51.31;79)	(362.09;84.47;97)	(326.44;54.13;109)	(356.82;82.22;90)	(360.74;69.87;101)	(356.67;66.29;112)
BPG	DBVPG1841	2	Domesticated	01. Wine European 1	31	CASBNP01;GCA_949124845.1	337	14.74	270.13	342.56	342	343	91.9	0.27	0.26	5.79	(319.15;63.65;13)	(354.36;58.76;11)	(318.3;75.39;23)	(278.5;25.5;2)	(347.83;82.03;6)	(381.93;68.86;15)	(484.0;205.9;4)	(307.55;57.0;11)	(339.92;60.34;12)	(316.0;81.14;10)		(326.9;64.83;10)	(380.33;30.35;12)	(535.29;26.96;7)	(348.86;38.43;7)	(408.0;45.93;8)	(435.38;86.28;8)	(350.47;101.66;15)	(340.8;70.65;15)	(341.79;123.24;14)		(288.0;99.43;12)	(299.55;51.32;11)	(263.74;77.22;23)	(342.88;89.97;17)	(311.64;44.28;11)	(288.47;43.19;15)	(339.25;64.65;8)	(347.8;74.34;10)	(354.5;52.22;4)	(415.76;72.28;17)	(357.0;103.66;6)
CRL	C-6	2	Domesticated	01. Wine European 1	32	CASBOI01;GCA_949125125.1	1653	14.61	409.25	432.32	420	380	114.19	0.26	0.72	6.2	(475.6;111.82;47)	(402.73;76.98;56)	(411.54;99.52;71)	(418.9;80.78;49)	(826.62;68.15;26)	(469.75;117.2;51)	(468.99;79.92;73)	(414.91;97.35;69)	(474.59;96.86;51)	(364.3;68.54;74)	(441.81;74.69;57)	(450.67;143.02;48)	(426.62;84.77;53)	(436.2;77.97;50)			(407.98;79.91;49)	(509.42;74.21;55)	(361.76;81.43;62)	(511.77;207.68;57)	(395.74;76.73;47)	(403.22;83.31;50)	(432.91;79.12;47)	(407.69;97.39;49)	(416.21;98.08;24)	(427.06;98.73;36)	(410.54;59.96;35)	(406.43;73.1;44)	(430.94;83.12;48)	(421.24;66.14;59)	(350.6;80.07;60)	(365.6;60.79;72)	(ChrVIII_ChrXVI_Left;392.96;94.0;26)(ChrVIII_ChrXVI_Right;514.53;76.32;58)
ALS_1a	21-4-116	2	Wild	01. Wine European 1	31	CASBLD01;GCA_949124125.1	9349	13.14	271.48	332.11	323	318	82.36	0.25	1.06	6.21	(353.77;61.68;447)	(315.55;51.41;407)	(326.75;66.57;233)	(321.15;56.61;288)	(429.21;73.64;292)	(274.66;52.28;461)	(327.72;62.06;141)	(315.46;56.99;300)	(312.07;61.89;303)	(323.54;50.65;282)	(327.29;67.8;319)	(301.09;54.03;411)	(348.61;67.14;223)	(315.47;59.38;234)	(308.49;54.58;252)	(283.03;54.04;276)	(326.15;58.02;332)	(368.86;72.97;346)	(387.05;61.65;315)	(316.38;53.83;321)	(328.09;62.06;259)	(319.85;63.53;279)	(278.31;58.24;311)	(573.4;111.9;266)	(274.68;52.11;299)	(351.52;66.08;313)	(279.7;60.35;149)	(369.64;66.45;253)		(378.25;68.51;312)	(305.34;52.08;439)	(291.77;54.4;286)
AAC_collapsed	CBS2165a	2	Domesticated	12. Ale beer	32	CASBKW01;GCA_949124335.1	3080	14.83	321.84	348.14	346	343	67.51	0.19	-0.12	5.56	(334.12;66.83;141)	(328.15;50.32;100)	(362.03;55.68;63)	(392.42;52.32;45)	(345.13;61.11;113)	(347.22;55.11;37)	(343.01;66.8;146)	(345.36;69.43;137)	(347.0;51.91;86)	(379.08;72.71;74)	(325.23;59.66;112)	(324.71;58.58;129)	(345.21;58.86;95)	(334.84;55.82;121)	(341.36;50.13;85)	(324.15;58.34;86)	(341.99;66.08;97)	(360.54;84.02;110)	(366.47;55.06;129)	(349.29;62.22;63)	(312.36;64.57;121)	(371.08;59.68;89)	(415.22;79.91;139)	(341.19;53.39;31)	(345.54;51.87;26)	(358.04;70.91;125)	(371.04;52.02;121)	(337.09;69.26;126)	(347.57;65.74;68)	(339.27;68.93;175)	(303.88;159.89;8)	(347.07;56.17;82)
CAS_1a	B-17	2	Domesticated	02. Wine European 2	32	CASBOH01;GCA_949125665.1	12492	13.24	186.66	202.54	200	188	52.62	0.26	1.98	4.43	(175.27;46.02;724)	(203.55;46.28;679)	(192.55;46.75;407)	(209.07;43.16;329)	(248.71;54.32;377)	(204.01;46.91;474)	(174.57;45.78;371)	(179.61;47.61;437)	(193.17;40.73;333)	(184.24;46.27;317)	(192.92;41.89;533)	(209.14;43.64;545)	(208.78;44.34;422)	(232.98;47.31;375)	(244.49;50.24;354)	(189.43;44.37;322)	(188.54;44.55;329)	(193.59;45.68;286)	(195.26;46.1;292)	(180.51;44.41;322)	(213.46;46.29;293)	(194.86;46.63;300)	(202.42;84.78;404)	(195.43;43.8;401)	(205.02;50.42;381)	(179.14;41.68;399)	(210.13;46.71;386)	(185.63;49.29;295)	(262.01;47.13;319)	(211.59;46.16;353)	(199.18;52.43;360)	(248.02;48.82;373)
CQS_1a	CEY647	2	Wild		32	CASBOE01;GCA_949124895.1	2304	14.56	294.88	317.12	312	310	69.18	0.22	0.99	5.96	(291.47;59.3;77)	(312.48;60.32;71)	(330.74;66.11;72)	(304.36;58.27;94)	(331.29;81.03;63)	(380.84;98.62;77)			(301.0;59.81;60)	(310.22;63.49;98)	(320.18;93.26;102)	(331.28;55.1;53)	(324.43;58.27;86)	(301.16;53.17;77)	(289.42;58.55;77)	(290.95;51.27;56)	(305.87;60.23;47)	(316.15;60.25;82)	(319.74;47.07;23)	(325.47;50.34;83)	(334.7;67.15;60)	(318.86;71.54;73)	(338.95;71.5;81)	(328.59;105.23;76)			(327.57;57.3;42)	(280.0;63.22;84)	(343.42;56.42;93)	(310.07;56.29;91)	(295.78;45.4;69)	(340.22;44.34;27)	(ChrIV_ChrXIII_Left;314.06;56.64;52)(ChrXIII_ChrIV_Left;297.0;77.69;87)(ChrXIII_ChrIV_Right;310.3;60.06;84)(ChrIV_ChrXIII_Right;337.2;58.46;87)
CLL_collapsed	K10	2	Domesticated	16. Asian fermentation	31	CASBOO01;GCA_949125335.1	712	13.32	269.58	288.38	284	265	65.16	0.23	0.46	4.91	(319.0;73.82;18)	(253.23;64.67;13)	(251.75;37.83;28)		(265.71;55.86;7)	(278.65;84.72;23)	(288.08;35.8;24)	(236.44;75.55;16)	(277.85;65.34;27)	(262.3;45.11;20)	(307.92;106.76;12)	(267.09;47.8;23)			(274.07;58.24;30)	(282.46;50.55;35)	(307.73;64.56;49)	(307.69;67.74;32)	(355.93;81.26;15)	(291.47;59.02;19)	(271.5;64.84;28)	(286.0;48.58;19)	(333.17;72.72;6)	(250.56;46.58;9)	(314.78;73.8;27)	(313.79;46.48;28)	(262.27;46.29;11)	(300.31;46.77;26)	(312.0;71.37;28)	(279.78;64.51;23)	(296.67;51.52;21)	(282.31;40.65;32)	(ChrVII_ChrIV_Right;309.16;58.64;31)(ChrVII_ChrIV_Left;265.47;62.55;32)
ACA	EM93_3	1	Wild	13. Lab-related	32	CASBKZ01;GCA_949124315.1	914	14.95	418.41	423.04	412.5	371	116.48	0.28	1.13	5.4	(340.3;81.4;23)	(468.7;94.92;20)	(434.25;101.5;44)	(401.38;69.06;32)	(841.91;265.52;11)	(413.71;63.63;24)	(342.79;88.07;19)	(376.57;77.23;30)	(434.46;67.98;26)	(341.82;66.47;33)	(403.46;92.77;26)	(405.3;99.46;23)	(359.44;104.1;34)	(496.87;124.78;38)	(417.3;116.02;30)	(410.38;81.27;32)	(469.32;114.37;25)	(424.03;120.63;30)	(392.78;73.83;27)	(366.16;72.34;19)	(456.03;77.12;36)	(510.61;65.19;33)	(379.97;95.83;30)	(433.79;103.91;28)	(405.06;79.18;34)	(514.65;129.8;31)	(426.6;95.48;30)	(347.68;81.65;31)	(346.12;72.96;24)	(526.97;63.74;29)	(398.57;59.7;30)	(427.84;61.44;32)
CLN	K14	2	Domesticated	16. Asian fermentation	32	CASBOK01;GCA_949124915.1	986	13.16	293.81	324.42	319	321	73.95	0.23	0.56	5.82	(334.48;74.54;23)	(322.68;51.17;37)	(450.0;0.0;1)	(331.84;71.64;38)	(407.52;109.48;21)	(315.18;51.88;39)	(289.31;65.56;26)	(304.21;52.1;47)	(322.92;50.13;25)	(355.35;71.05;52)	(280.61;44.76;46)	(329.7;54.61;20)	(339.0;65.77;19)	(321.56;61.35;39)	(289.23;45.34;26)	(327.72;45.46;29)	(330.92;74.46;26)	(390.83;155.74;29)	(400.38;65.77;39)	(327.39;65.49;36)	(311.39;50.39;41)	(291.93;43.22;14)	(282.98;72.3;45)	(319.6;65.96;30)	(335.59;58.14;39)	(354.0;55.82;33)	(316.44;48.58;34)	(301.82;57.77;34)	(300.08;46.8;36)	(400.0;175.84;7)	(317.85;52.28;20)	(291.26;55.64;35)
ALH_1c	CLQCA_19-011(1c)	1	Wild	16. Asian fermentation	32	CASBKE01;GCA_949124385.1	787	12.87	199.22	222.1	222	189	59.2	0.27	0.24	4.98	(228.04;42.27;25)	(171.14;42.78;28)	(198.12;50.54;26)	(245.17;70.28;18)	(305.68;79.62;22)	(218.89;42.83;19)	(258.24;73.35;25)	(186.24;40.74;21)	(226.68;63.2;19)	(194.81;48.11;16)	(224.13;32.19;23)	(268.89;66.32;19)	(204.42;46.48;33)	(242.43;27.11;21)	(196.12;48.88;25)	(204.12;36.5;16)	(208.16;39.5;19)	(245.44;57.06;34)	(190.75;47.09;28)	(240.03;44.83;31)	(182.12;50.64;24)	(246.92;48.63;26)	(206.03;44.73;32)	(171.28;45.79;25)	(257.23;55.76;22)	(225.07;52.3;44)	(227.88;48.51;16)	(216.46;46.65;28)	(241.83;66.49;29)	(217.95;37.55;22)	(235.53;53.28;30)	(233.24;67.94;21)
CRE_collapsed	CLQCA_17-111	3	Wild	16. Asian fermentation	30	CASBPA01;GCA_949125295.1	428	14.57	276.57	303.48	300.5	324	68.16	0.22	0.12	4.84	(327.47;66.23;15)	(302.56;47.59;18)	(320.11;61.34;18)	(341.37;73.28;19)	(326.67;42.93;9)	(354.71;39.97;7)	(295.44;70.1;27)	(350.53;52.85;17)			(291.33;27.8;9)		(263.9;60.58;21)	(239.85;62.67;13)	(321.41;44.24;22)	(259.43;41.92;7)	(298.0;0.0;1)	(305.6;26.4;10)	(291.93;73.86;29)		(245.45;93.45;11)	(282.53;42.25;15)	(327.14;74.48;21)	(313.4;60.85;20)	(373.25;97.0;16)		(290.39;58.05;28)	(263.09;55.79;11)	(350.5;35.95;4)	(278.4;58.76;15)	(304.54;47.81;24)	(340.0;0.0;1)	(ChrX_ChrV_Right;249.33;29.61;6)(ChrX_ChrV_Left;295.79;44.85;14)
CPG_1a	1560	1	Wild	03. Alpechin	32	CASBOF01;GCA_949125375.1	3948	14.17	275.16	304.18	302	289	61.3	0.2	0.16	4.58	(286.52;62.02;128)	(309.06;49.66;129)	(322.98;60.68;129)	(284.01;58.08;127)	(291.68;54.24;126)	(315.19;51.3;86)	(281.9;55.74;137)	(311.45;57.59;144)	(313.75;53.21;129)	(270.06;56.32;161)	(306.61;53.6;88)	(292.15;65.68;85)	(284.67;47.53;126)	(318.09;50.35;141)	(318.8;54.64;138)	(308.74;59.17;85)	(289.78;45.34;83)	(311.92;49.34;135)	(295.99;52.49;132)	(364.84;58.55;129)	(379.12;70.3;131)	(268.62;60.54;132)	(309.03;48.71;117)	(267.37;56.43;163)	(307.39;52.72;163)	(319.77;55.92;106)	(301.82;53.74;130)	(351.72;54.08;85)	(320.16;62.87;134)	(311.33;54.83;63)	(286.58;55.63;148)	(270.64;46.43;138)
CGH_1_collapsed	VNL3	3	Domesticated	16. Asian fermentation	32	CASBOZ01;GCA_949125895.1	1496	14.92	316.5	341.92	337	301	70.38	0.21	0.33	4.47	(385.18;75.49;56)	(313.06;67.79;48)	(317.66;62.27;50)	(317.36;49.87;55)	(358.51;49.5;41)	(430.14;76.82;49)	(353.27;58.48;49)	(338.46;68.28;48)					(318.74;56.97;62)	(305.53;50.08;15)			(358.2;65.63;70)	(328.57;51.35;23)	(315.54;51.95;46)	(313.12;49.16;40)	(345.19;82.07;54)	(327.15;79.97;33)	(371.08;70.63;75)	(351.68;72.92;60)	(300.65;54.35;43)	(311.48;64.99;48)	(336.85;71.03;54)	(316.17;50.75;41)	(364.65;70.95;57)	(358.32;64.23;22)			(ChrXVI_ChrV_Left;328.74;57.27;58)(ChrVIII_ChrVI_Right;341.44;51.75;32)(ChrVI_ChrVIII_Left;351.65;74.32;46)(ChrV_ChrXVI_Left;300.4;61.74;42)(ChrV_ChrXVI_Right;394.56;58.49;27)(ChrXVI_ChrV_Right;340.28;63.15;36)(ChrVIII_ChrVI_Left;324.15;62.93;66)(ChrVI_ChrVIII_Right;381.58;50.82;50)
AAR	CLIB382_1b	1	Domesticated	06. Mosaic beer	30	CASBKI01;GCA_949124305.1	2019	15.22	272.93	286.65	287	291	61.61	0.21	-0.15	5.7	(272.29;58.34;78)	(286.62;61.12;91)	(308.42;65.25;80)	(279.53;39.76;45)	(347.4;71.96;65)		(277.21;49.83;85)	(327.69;45.66;55)	(254.28;62.7;67)	(330.44;65.78;71)	(278.86;55.37;44)	(275.11;37.86;73)	(265.94;62.47;72)	(355.21;56.19;63)	(291.6;59.56;88)	(251.22;42.84;97)	(264.29;59.61;31)	(295.36;63.34;74)	(280.55;41.36;69)	(284.23;53.25;70)	(258.75;53.94;67)	(297.18;47.98;74)	(242.35;41.56;49)	(265.95;55.08;62)	(315.29;59.74;70)	(301.31;56.58;71)	(255.12;49.07;72)	(289.51;46.35;82)	(297.92;58.82;87)			(255.52;57.51;67)
AMP_1a	SJ5L14	2	Wild	04. Cider	27	CASBKN01;GCA_949124115.1	10104	13.17	340.07	397.1	388	387	86.98	0.22	0.54	5.58		(371.39;65.17;257)	(341.41;59.89;417)	(370.89;60.17;377)			(378.71;67.1;460)	(397.4;61.74;373)	(397.51;65.45;384)	(377.14;64.34;355)	(359.82;73.29;373)		(438.24;69.02;435)	(376.1;67.04;403)	(416.08;60.39;398)	(428.73;63.17;394)	(424.9;73.85;320)		(361.95;60.66;411)	(384.65;79.38;544)	(434.76;63.41;319)	(337.36;59.31;355)	(371.55;65.54;430)	(536.33;80.32;367)	(435.48;77.36;399)	(378.88;68.9;243)		(601.5;92.81;330)	(341.89;60.72;315)	(361.79;57.32;437)	(361.74;68.02;422)	(378.38;58.24;430)	(ChrIII_ChrX_Right;386.07;59.36;156)
BDN_1c	MAJ_G	1	Wild	08. African beer	25	CASBMU01;GCA_949124815.1	6976	14.1	175.6	240.94	240	244	62.93	0.26	0.21	4.8			(209.2;52.36;405)	(226.42;68.7;12)	(315.74;78.21;487)		(240.43;57.76;72)	(230.99;58.0;428)	(233.99;57.89;428)	(221.02;55.55;187)		(219.73;51.68;366)			(237.91;51.66;207)	(242.33;57.37;261)	(265.94;57.41;195)	(256.27;59.11;455)	(226.1;47.72;301)	(256.69;59.95;318)			(254.6;60.35;552)	(189.93;41.12;15)	(234.46;53.84;166)		(215.15;52.11;610)		(256.72;56.68;297)	(240.13;53.71;150)	(244.85;42.85;147)	(220.25;47.53;165)	(ChrXI_ChrVII_Right;209.67;27.11;3)(ChrVII_ChrXI_Left;254.42;53.16;353)(ChrVII_ChrXI_Right;207.83;53.17;396)
BAF_collapsed	DJ74	2	Domesticated	19. African palm wine	29	CASBNO01;GCA_949124855.1	610	14.73	385.28	413.81	409.5	373	95.85	0.23	0.05	6.5	(414.69;57.86;13)	(362.96;68.44;23)	(512.25;149.52;12)	(422.27;82.97;22)	(419.5;89.33;14)	(450.93;116.38;15)	(423.88;68.38;32)	(397.7;100.65;23)	(427.45;86.32;20)	(445.27;49.16;11)	(401.16;80.95;31)	(401.82;89.25;22)	(409.04;72.43;27)	(467.0;71.49;19)	(420.74;110.44;19)	(358.88;69.84;17)		(454.0;79.91;11)	(412.0;117.07;16)		(381.67;87.78;24)	(408.97;60.2;36)	(439.54;149.35;13)	(446.87;78.69;30)	(391.76;135.54;21)	(368.04;98.74;23)		(396.06;75.09;17)	(390.04;95.82;24)	(439.14;114.1;28)		(427.16;95.72;19)	(ChrIX_ChrXIV_Left;406.39;75.66;28)
AAB	CBS422a	1	Domesticated	06. Mosaic beer	22	CASBKP01;GCA_949124225.1	1253	14.53	308.77	306.44	313	329	96.34	0.31	1.3	4.68	(152.93;70.06;84)				(335.09;82.67;53)	(262.47;63.78;43)	(273.47;58.14;55)	(311.09;86.55;35)	(361.78;79.0;36)	(359.72;77.07;40)	(292.86;47.37;36)	(305.97;64.27;36)	(330.45;76.56;94)		(318.06;61.27;47)		(288.69;67.23;42)	(343.92;75.45;49)			(329.68;89.99;59)		(338.78;88.84;32)	(350.08;76.64;79)	(292.29;56.74;49)		(333.4;61.84;57)	(263.52;73.61;42)	(330.79;132.48;126)	(351.9;93.55;73)		(261.41;69.16;86)
AIE	CBS2910	1	Human	03. Alpechin	29	CASBKB01;GCA_949124095.1	2930	15.22	291.59	299.34	296	288	73.11	0.24	0.67	5.12		(268.61;63.07;83)		(310.21;64.9;108)	(361.73;48.26;30)		(247.26;52.98;72)	(401.03;81.92;88)	(277.37;59.03;129)	(333.2;58.4;101)		(289.81;53.17;122)	(288.72;63.07;123)	(339.14;65.33;98)	(262.22;61.56;110)	(295.02;75.71;110)	(273.72;77.46;427)	(322.77;90.4;195)	(304.11;54.57;108)	(295.13;65.72;108)	(275.84;60.29;81)	(300.7;60.16;44)	(346.61;67.67;123)	(306.64;61.43;163)	(315.92;62.16;109)	(289.59;49.12;78)	(229.5;10.5;2)	(301.04;52.87;121)	(295.73;63.45;107)			(268.96;56.6;90)
BAQ_1a	HN19	2	Wild	24. CHN-III	32	CASBMM01;GCA_949124725.1	792	12.77	292.41	324.22	319	298	73.78	0.23	0.3	5.23	(289.85;53.57;13)	(316.6;64.41;20)	(308.47;55.01;17)	(319.6;84.62;30)	(342.47;51.29;17)	(274.1;88.81;10)	(352.11;54.88;35)	(303.07;48.65;30)	(286.63;72.93;27)	(314.52;49.0;21)	(316.04;73.02;23)	(323.96;59.03;23)	(303.41;53.32;32)	(317.1;63.71;30)	(321.69;75.09;29)	(328.24;39.17;21)	(324.5;72.15;34)	(333.36;42.9;22)	(322.11;69.03;27)	(315.93;35.44;15)	(267.18;54.08;33)	(325.48;61.08;29)	(304.5;62.8;26)	(391.61;87.34;23)	(305.58;63.5;31)	(312.57;66.64;28)	(310.06;55.97;36)	(501.37;52.25;27)	(318.73;52.04;15)	(358.96;57.55;24)	(298.87;31.65;15)	(330.31;63.15;29)
CIH_collapsed	PB12	2	Human	14. European clinical	22	CASBOR01;GCA_949125675.1	555	14.41	357.14	336.33	352	326	117.61	0.35	-0.49	5.53	(198.39;129.96;28)	(390.91;52.33;11)	(390.5;96.67;8)		(386.34;144.31;83)	(279.19;127.8;27)	(291.21;60.98;19)		(324.04;62.81;27)			(337.8;105.21;15)	(325.68;123.1;19)	(316.47;87.22;19)	(329.19;96.45;21)				(336.16;118.39;25)	(316.45;99.38;31)	(335.54;103.16;35)		(339.66;73.42;35)		(341.46;82.77;13)	(347.9;145.43;21)	(341.73;105.74;37)	(320.22;120.77;18)				(370.67;96.87;24)	(ChrXII_ChrIV_Left;387.41;88.58;22)(ChrXII_ChrIV_Right;364.71;66.26;17)
CCC_1a	CLQCA_20-156	2	Wild	20. American	32	CASBNU01;GCA_949124955.1	817	12.8	409.94	426.91	411	353	126.82	0.3	0.59	5.24	(370.64;133.47;25)	(380.02;65.21;40)	(471.25;117.76;16)	(362.85;70.56;27)	(457.68;68.24;28)	(688.71;95.91;21)	(548.59;95.67;17)	(353.87;62.81;38)	(520.96;144.0;23)	(638.0;183.15;17)	(346.06;83.66;32)	(405.48;93.69;29)	(478.58;97.73;24)	(365.03;72.16;32)	(400.81;89.43;31)	(420.22;94.54;27)	(411.63;56.36;27)	(390.85;69.66;26)	(510.82;148.59;11)	(411.0;65.46;17)	(500.59;82.81;27)	(425.88;122.95;34)	(454.52;82.5;27)	(630.57;111.57;23)	(378.14;74.73;22)	(349.42;89.12;43)	(455.8;108.71;25)	(399.45;80.66;31)	(330.7;61.43;10)	(346.38;91.44;13)	(577.33;149.97;9)	(345.51;70.26;45)
ANL_collapsed	A-6	4	Domesticated	08. African beer	32	CASBLB01;GCA_949124415.1	672	13.48	605.69	613.89	589.5	449	188.48	0.31	1.41	6.11	(578.77;128.0;13)	(586.17;164.89;29)	(622.24;259.28;17)	(607.21;93.53;24)		(670.19;100.88;21)	(669.16;141.22;25)	(570.26;160.98;27)	(588.13;161.22;23)	(504.61;83.73;31)	(575.64;107.47;11)	(729.22;96.59;18)	(846.78;430.7;18)	(609.36;144.45;39)	(610.41;86.2;27)	(506.27;173.68;22)	(466.39;79.53;28)	(742.18;98.57;22)	(626.56;103.85;25)	(481.94;72.43;16)	(631.5;154.65;12)	(532.07;125.71;29)	(766.8;125.66;5)	(578.33;138.8;27)		(869.62;234.53;26)	(627.63;149.18;30)	(527.07;121.92;45)	(564.7;79.77;20)	(620.22;181.63;18)	(865.5;273.33;18)	(499.33;76.62;6)
CCN	VKM_Y-504:S	2	Wild	25. Far East Asian	32	CASBNV01;GCA_949125475.1	1833	14.78	345.25	363.9	356	318	89.09	0.24	0.49	5	(331.07;80.94;43)	(386.58;74.31;55)	(353.45;73.47;60)	(381.12;78.76;64)	(390.7;95.91;64)	(515.47;130.73;49)	(401.16;81.04;67)	(307.24;51.83;59)	(320.29;56.5;62)	(377.33;79.13;64)	(343.84;69.43;55)	(375.67;56.47;60)	(330.02;75.99;66)	(419.7;86.7;61)	(383.0;88.11;61)	(310.87;71.24;60)	(384.28;89.29;47)	(297.14;58.9;65)	(424.72;98.68;50)	(310.35;67.79;51)	(336.68;68.17;60)	(381.69;70.26;51)	(385.98;87.32;51)	(410.85;78.01;48)	(403.68;82.98;77)	(383.25;66.13;59)	(309.75;52.4;56)	(323.69;64.84;54)	(341.93;79.79;55)	(363.26;70.89;65)	(362.11;85.78;47)	(305.0;70.05;47)
AFI	CBS2183	1	Domesticated	02. Wine European 2	31	CASBKT01;GCA_949124405.1	1600	14.29	165.52	175.62	173	203	44.13	0.25	0.21	4.23	(156.37;40.34;30)	(174.31;46.08;36)	(170.52;34.51;50)	(187.45;39.37;47)	(222.87;52.5;45)	(158.71;31.47;42)	(153.7;40.5;54)	(194.54;37.0;63)	(147.2;44.71;49)	(173.43;41.82;54)	(163.32;32.63;34)	(174.9;39.26;41)	(178.64;34.27;45)	(174.99;36.45;80)			(179.37;32.99;41)	(214.38;38.2;48)	(160.08;51.97;36)	(191.04;43.11;56)	(171.47;43.27;57)	(154.02;35.0;46)	(188.16;37.85;56)	(173.67;37.1;63)	(193.69;48.2;54)	(175.29;43.2;55)	(167.53;41.88;36)	(196.76;43.01;50)	(178.0;44.21;48)	(164.28;49.16;43)		(181.39;54.88;49)	(ChrVIII_ChrXVI_Left;160.34;36.28;148)(ChrVIII_ChrXVI_Right;169.75;36.84;44)
AHL	CBS3081	1	Domesticated	03. Alpechin	32	CASBKQ01;GCA_949124345.1	3775	13.12	339.62	354.37	349	342	80.34	0.23	1.65	5.18	(299.9;53.31;116)	(415.39;70.32;152)	(393.01;138.28;113)	(344.93;51.53;122)	(428.63;68.76;138)	(284.13;47.42;113)	(384.44;60.58;130)	(350.0;61.89;145)	(325.35;45.45;135)	(321.45;53.51;132)	(299.08;58.37;150)	(337.0;49.33;83)	(367.26;62.62;137)	(373.75;55.57;136)	(368.05;70.12;108)	(354.99;49.91;107)	(324.71;49.75;42)	(356.27;52.2;124)	(332.18;53.94;133)	(408.9;56.82;100)	(329.76;56.82;101)	(512.33;88.95;133)	(325.84;48.13;125)	(363.72;80.87;135)	(324.46;48.88;134)	(328.03;62.99;116)	(417.63;67.48;116)	(333.9;56.63;125)	(365.81;79.85;78)	(359.0;59.7;42)	(293.09;45.0;97)	(288.99;54.37;157)
ALH_1b	CLQCA_19-011(1b)	2	Wild	16. Asian fermentation	29	CASBKO01;GCA_949124175.1	358	13.02	214.83	255.08	251	258	61	0.24	0.28	5.92	(243.93;49.74;15)	(243.08;40.85;13)	(219.4;71.27;10)	(239.5;37.66;12)	(329.25;92.21;24)	(258.82;57.26;11)	(246.77;51.32;13)	(235.86;38.48;7)	(268.17;42.37;6)	(242.91;43.47;11)	(217.69;39.87;13)	(283.67;66.54;6)	(295.12;77.18;8)	(270.31;39.72;13)		(256.35;54.01;20)	(234.17;56.07;12)	(222.38;77.17;8)	(253.69;40.9;13)	(241.45;52.07;11)		(277.11;48.76;18)	(222.06;34.13;16)	(231.17;34.78;12)	(255.08;77.04;13)	(265.8;56.53;10)	(247.6;37.21;15)	(223.81;36.7;16)	(318.5;40.05;8)		(262.4;46.11;15)	(266.56;31.43;9)
CPI_1c	LCBG-3D6	1	Domesticated	10. Mexican distillery/agave	24	CASBOB01;GCA_949125765.1	331	14.64	315.92	410.76	401	361	125.05	0.3	0.94	5.57		(325.67;81.66;12)	(353.07;66.51;15)	(549.5;102.51;14)	(378.87;102.16;23)	(411.0;116.88;8)	(389.89;122.34;19)	(399.09;55.78;11)	(403.44;53.73;18)	(368.09;70.69;11)		(332.27;41.8;15)	(443.86;120.11;7)		(474.5;61.08;8)		(355.71;80.77;24)	(341.69;72.02;13)	(383.13;115.56;23)	(405.92;55.27;25)		(354.91;47.89;11)	(477.29;131.62;14)		(611.14;205.65;14)	(340.26;75.35;19)			(615.25;96.58;16)			(425.18;71.52;11)
ATM_1a	UC10	2	Domesticated	01. Wine European 1	31	CASBNN01;GCA_949124615.1	487	14.26	219.61	244.71	245	232	60.4	0.25	0.57	3.95	(198.33;39.02;12)	(239.0;60.44;12)	(286.42;34.32;12)	(285.68;26.65;19)	(285.31;41.14;16)	(238.29;47.83;28)	(217.21;51.28;14)	(247.62;34.14;21)	(265.91;38.92;22)	(265.74;46.07;23)	(246.16;38.65;19)	(225.33;53.83;18)	(271.17;50.79;6)	(210.33;27.73;12)	(248.6;41.96;10)	(304.15;33.92;13)	(226.64;41.23;22)		(171.2;49.49;25)	(204.42;49.16;12)	(224.53;50.07;17)	(304.19;102.46;16)	(285.92;69.6;12)	(231.6;61.82;15)	(319.56;45.81;16)	(257.59;58.7;22)	(206.75;39.23;12)	(213.72;41.72;18)	(272.33;29.48;15)		(176.53;31.22;15)	(242.23;24.84;13)
ANM_collapsed	A-18	4	Domesticated	08. African beer	32	CASBLF01;GCA_949124205.1	1174	14.56	639.84	597.36	592	494	150.56	0.25	0.02	4.28	(639.68;180.14;31)	(567.85;132.24;33)	(668.2;141.73;46)	(556.7;172.0;37)	(722.68;136.96;44)	(517.79;132.53;28)	(590.32;87.49;19)	(617.39;154.0;57)	(582.48;110.45;54)	(644.44;123.39;32)	(669.74;141.45;34)	(683.15;132.38;26)	(611.54;159.49;35)	(523.06;140.35;88)	(636.26;200.84;54)	(632.19;130.27;31)	(586.55;162.05;40)	(541.6;107.77;45)	(715.79;124.02;19)	(494.44;125.13;27)	(630.16;136.66;31)	(634.48;148.45;23)	(587.2;140.89;15)	(645.57;120.44;35)	(521.96;116.79;46)	(531.58;100.63;31)	(590.75;119.39;79)	(613.03;146.79;34)	(573.78;105.66;9)	(514.9;118.91;40)	(616.0;144.09;23)	(587.54;145.12;28)
CGH_3_collapsed	VNL3	3	Domesticated	16. Asian fermentation	29	CASBNT01;GCA_949125285.1	1272	14.62	312.55	336.01	328	288	80.62	0.24	0.86	4.92	(329.36;67.55;67)		(287.86;48.92;14)	(300.06;66.0;33)	(394.9;69.58;29)		(368.37;74.84;52)	(334.89;79.2;57)	(288.53;61.46;36)	(442.12;138.53;49)	(352.73;107.22;41)	(346.6;93.08;96)	(315.06;63.88;54)	(281.73;32.89;11)	(315.6;50.5;58)	(298.67;51.54;6)		(327.91;63.83;45)	(311.42;59.87;59)	(324.58;65.41;57)	(329.25;56.75;28)	(377.47;95.93;32)	(358.45;67.49;66)	(322.92;60.53;51)	(310.54;59.56;52)	(310.7;54.24;46)	(352.28;61.46;54)	(319.88;52.13;41)	(340.0;0.0;1)		(332.15;61.91;47)	(334.73;87.16;90)
BGP_1a	CLIB562	1	Domesticated	07. French dairy	32	CASBMV01;GCA_949124655.1	7653	14.64	350.97	380.72	371	315	95.72	0.25	4.67	5.32	(472.13;70.42;248)	(371.56;70.3;285)	(442.44;81.22;209)	(315.82;52.18;232)	(357.91;75.2;214)	(350.58;60.65;231)			(346.21;60.58;236)	(530.38;74.57;213)	(411.32;58.47;248)	(328.18;62.0;250)	(422.77;69.85;228)	(447.95;76.6;230)	(303.54;54.21;233)	(364.75;57.53;244)	(329.28;60.71;244)	(361.74;68.99;199)			(338.42;59.63;277)	(421.44;66.55;277)	(443.09;75.51;205)	(365.92;66.95;212)	(384.87;68.62;290)	(583.04;95.8;190)	(376.49;66.25;252)	(419.67;217.18;216)	(361.04;71.9;239)	(397.16;68.43;235)	(349.87;61.22;250)	(390.65;60.8;254)	(ChrX_ChrIV_Right;327.88;52.26;257)(ChrIV_ChrX_Right;324.8;51.69;261)(ChrX_ChrIV_Left;326.81;55.84;234)(ChrIV_ChrX_Left;302.03;53.58;260)
ASG	CBS1489	2	Human	01. Wine European 1	32	CASBNB01;GCA_949124595.1	2334	14.73	378.69	387.09	382	359	88.26	0.23	0.38	5.2	(468.5;106.26;38)	(342.03;47.46;39)	(382.58;92.13;130)	(406.77;85.92;145)	(388.07;78.62;88)	(407.08;60.47;90)	(380.39;77.62;64)	(444.09;52.62;75)	(327.73;49.55;41)	(336.5;58.94;76)	(565.36;121.01;39)	(354.51;62.24;51)	(383.96;46.65;28)	(350.71;50.9;51)	(403.39;73.5;96)	(352.46;83.96;85)	(407.27;76.06;75)	(332.36;72.47;94)	(353.82;77.44;115)	(386.01;72.76;91)	(364.11;66.02;81)	(436.05;67.56;59)	(452.0;69.21;69)	(416.07;52.0;84)	(374.59;56.27;90)	(325.88;73.95;75)	(430.77;91.0;65)	(541.1;70.95;50)	(352.43;64.3;88)	(378.94;76.77;18)	(330.78;79.28;81)	(347.79;67.39;63)
ATV_collapsed	CECT1462	4	Domesticated	12. Ale beer	27	CASBMT01;GCA_949124625.1	271	13.6	236.74	289.53	291	223	75.51	0.26	0.81	6.86	(289.74;70.66;23)		(282.85;46.57;13)	(257.3;87.48;10)	(384.5;46.52;4)	(261.0;86.47;15)		(283.83;51.48;6)		(290.47;59.9;15)	(299.18;42.64;17)	(320.5;78.5;2)	(334.33;19.91;3)	(226.0;0.0;1)	(268.22;60.23;9)	(263.45;59.44;11)	(303.84;132.49;19)	(290.67;40.43;15)	(273.44;20.62;9)	(288.12;43.01;8)	(315.15;52.14;20)	(243.29;73.71;14)	(55.0;0.0;1)	(358.29;39.53;7)	(283.18;77.2;11)	(307.0;51.11;11)	(258.6;48.24;10)			(341.91;99.41;11)	(293.0;38.77;6)
BFP_1a	EXF-7197	2	Wild	Mediterranean oak	32	CASBNA01;GCA_949124665.1	10501	13.21	267.75	279.29	275	291	63.3	0.23	0.55	5.37	(268.82;57.92;315)	(248.04;41.92;330)	(267.44;52.2;350)	(288.88;46.71;326)	(436.02;68.55;285)	(322.12;58.59;301)	(294.42;53.06;337)	(272.22;45.77;337)	(257.35;46.28;371)	(283.78;53.17;344)	(255.11;50.9;361)	(268.01;50.18;316)	(290.11;49.0;307)	(334.24;50.43;346)	(254.85;50.73;344)	(287.78;44.36;330)	(250.36;50.03;322)	(293.07;56.82;312)	(273.78;47.56;335)	(278.6;49.76;352)	(282.57;46.7;346)	(246.67;50.14;327)	(301.98;63.17;323)	(275.02;48.44;323)	(243.62;40.43;354)	(257.35;44.74;322)	(331.43;62.0;340)	(232.69;47.34;311)	(321.13;49.89;279)	(214.09;52.82;311)	(261.36;45.91;313)	(272.74;47.72;331)
BFH_collapsed	EXF-5871	2	Domesticated	07. French dairy	32	CASBNK01;GCA_949124705.1	1325	14.63	402.31	424.51	413	426	117.45	0.28	0.96	5.79	(405.36;89.51;72)	(437.09;130.11;34)	(483.54;126.91;35)	(368.64;99.23;42)	(523.36;89.91;42)	(408.0;105.09;25)	(419.88;73.45;80)	(404.61;114.24;28)	(446.42;106.54;71)	(408.42;54.24;24)	(400.45;54.59;22)	(403.09;85.86;66)	(407.55;89.71;44)	(449.52;76.18;21)	(386.65;96.27;49)	(385.39;58.76;71)	(437.19;137.75;47)	(570.62;89.64;29)	(414.33;70.31;18)	(331.66;73.12;35)	(386.08;85.46;37)	(425.55;84.78;42)	(482.21;81.06;38)	(426.95;111.95;20)	(657.0;126.21;41)	(435.06;149.12;35)	(320.59;72.87;56)	(348.0;84.11;30)	(466.87;76.64;23)	(474.82;186.74;44)	(412.48;90.02;52)	(375.08;65.74;52)
BAL_1a	HN6	2	Wild	27. CHN-I	32	CASBMO01;GCA_949124715.1	877	12.94	239.91	275.04	269	232	62.03	0.23	0.61	4.34	(225.48;47.55;31)	(252.69;37.24;16)	(239.91;48.42;23)	(276.89;43.84;37)	(307.31;73.3;36)	(320.59;63.48;27)	(277.39;68.17;36)	(305.92;69.08;26)	(249.86;46.56;35)	(337.24;66.01;25)	(237.94;42.78;33)	(305.62;51.29;37)	(315.66;51.85;32)	(281.44;57.82;32)	(283.19;44.04;27)	(242.9;39.21;10)	(281.61;59.92;18)	(287.33;56.38;30)	(241.06;34.92;18)	(272.1;49.79;21)	(315.88;59.32;26)	(256.29;54.47;28)	(244.73;63.78;41)	(295.88;59.54;26)	(265.36;70.43;25)	(252.58;50.46;24)	(277.42;58.84;33)	(253.09;55.11;22)	(273.0;47.92;16)	(256.49;49.73;39)	(265.27;61.87;15)	(269.12;46.87;32)
BDF_1d	57	1	Wild	15. Israel evolution canyon	26	CASBNE01;GCA_949124565.1	1657	14.54	502.65	504.69	464	372	194.88	0.39	0.58	3.41	(585.22;140.73;72)	(382.73;60.96;59)	(428.91;92.63;32)	(483.2;119.77;65)	(690.15;146.43;26)	(801.29;225.01;45)		(788.39;252.41;51)	(397.67;95.29;69)		(471.57;89.57;63)	(687.89;176.56;36)	(408.18;79.71;62)	(710.62;158.49;47)	(352.09;67.85;69)	(338.92;58.61;66)	(546.28;122.41;64)	(446.16;115.62;62)	(593.41;67.95;34)	(352.16;58.53;38)	(413.82;114.63;56)	(476.2;111.48;15)	(796.3;240.62;50)	(596.96;186.31;246)	(378.51;73.52;78)			(342.96;86.24;133)		(400.55;80.64;66)		(569.49;124.42;53)
AEL_collapsed	CBS1394	2	Domesticated	17. Spanish	26	CASBLE01;GCA_949124135.1	374	13.62	312.27	414.03	411.5	419	107.55	0.26	-0.27	5.44	(394.88;56.03;17)		(446.13;98.46;15)	(398.82;160.67;17)	(405.39;121.15;18)		(469.0;111.62;12)	(397.82;122.77;22)	(426.71;86.04;17)		(521.5;41.04;4)	(376.25;42.43;8)	(494.07;85.0;15)	(367.0;90.26;8)		(405.64;130.59;25)	(421.2;77.56;5)				(338.7;99.5;10)	(392.86;76.46;7)		(382.3;112.49;20)	(406.83;81.59;18)	(419.2;93.54;10)	(364.46;78.67;13)	(327.67;64.51;3)	(398.2;70.98;10)	(472.05;72.14;21)	(420.0;52.17;10)	(510.43;148.91;14)	(ChrVIII_ChrV_Left;395.36;93.63;36)(ChrVIII_ChrV_Right;397.21;55.07;19)
BDC_1c	36	1	Wild	15. Israel evolution canyon	29	CASBNL01;GCA_949124805.1	7892	12.98	464.14	455.91	427	322	175.65	0.39	1.18	5.23	(524.1;88.93;321)	(385.0;57.61;364)	(316.32;79.39;369)	(710.07;225.62;99)	(687.16;182.61;139)	(518.05;111.67;274)	(297.06;93.05;375)	(655.42;128.85;216)	(320.23;57.57;393)		(470.1;83.94;307)	(652.23;152.02;127)	(875.26;245.01;87)	(430.37;74.02;345)	(378.12;66.21;402)	(410.81;67.85;349)	(407.46;95.25;381)	(334.82;63.7;397)	(594.14;116.63;214)	(679.59;122.79;172)	(545.36;112.32;226)	(838.32;293.76;81)	(358.73;61.65;355)	(959.83;341.98;88)	(444.02;70.54;383)		(606.65;120.45;209)	(419.44;76.66;304)		(490.18;87.62;308)	(537.44;118.72;262)	(254.85;64.58;345)
CKB_collapsed	malade_98_1655/125391	2	Human	01. Wine European 1	32	CASBOD01;GCA_949125415.1	2603	14.8	372.31	389.53	383	381	87.49	0.22	0.35	4.96	(364.59;55.86;98)	(411.91;89.55;67)	(358.42;70.77;97)	(485.37;97.28;94)	(449.35;92.75;85)	(489.58;96.17;101)	(332.55;57.88;111)	(331.68;58.89;78)	(348.47;56.43;34)	(360.55;66.96;94)	(406.65;96.11;82)	(369.4;64.9;97)	(426.32;64.46;44)	(372.32;73.56;81)	(379.93;70.83;87)	(389.3;66.74;114)	(374.64;71.28;76)	(389.86;74.79;65)	(441.53;85.65;85)	(431.3;57.66;91)	(400.51;80.66;90)	(422.44;86.41;98)	(373.5;61.62;22)	(397.85;78.09;80)	(390.41;88.8;104)	(398.03;62.45;97)	(368.84;70.07;37)	(322.82;66.67;96)	(364.08;74.33;100)	(419.0;83.43;76)	(312.91;70.59;98)	(319.79;67.82;24)
CQI_4a	MTF2552	2	Domesticated		28	CASBNY01;GCA_949126015.1	1575	14.58	282.71	318.19	312	296	86.21	0.27	0.45	5.99	(292.93;48.52;14)	(318.89;64.85;64)	(312.84;66.43;45)	(330.89;88.33;64)	(492.36;115.0;67)	(274.35;95.45;40)	(294.67;70.39;45)	(339.63;73.93;49)	(297.83;80.17;110)	(301.85;50.03;54)		(326.86;71.5;73)	(289.97;63.28;58)		(279.02;78.17;44)		(299.69;68.88;90)	(382.25;89.2;59)	(289.7;61.44;91)	(304.64;72.59;64)	(305.0;68.95;39)	(308.42;54.43;60)	(260.25;62.16;51)	(299.84;55.59;37)	(302.22;63.89;63)	(342.73;71.83;62)	(355.64;95.68;42)	(309.28;69.14;46)	(332.37;80.29;49)	(318.04;81.82;45)		(305.88;55.18;50)
BDH_1b	59	1	Wild	04. Cider	31	CASBNH01;GCA_949124685.1	997	12.05	372.13	375.77	374	390	80.32	0.21	0.07	3.9		(358.43;68.32;42)	(344.54;59.11;26)	(323.1;87.68;21)	(429.97;78.03;31)	(453.11;78.62;38)	(382.59;62.82;46)	(517.05;68.21;22)		(337.16;75.7;44)	(376.48;53.16;40)	(407.67;57.8;39)	(367.55;68.98;31)	(412.6;60.92;25)	(337.31;55.09;51)	(320.8;72.74;40)	(418.1;28.74;10)	(402.14;70.31;37)	(378.75;63.39;28)	(381.14;72.82;14)	(400.13;56.32;31)	(329.05;47.63;19)	(400.89;85.35;38)	(433.0;70.54;22)	(369.12;77.52;41)	(369.19;85.33;43)	(324.86;56.94;37)	(313.89;57.55;45)	(408.11;64.44;35)	(381.04;49.68;25)	(352.76;94.22;38)	(368.34;66.82;38)
CEQ_1a	MUCL_30909-2C	2	Domesticated	19. African palm wine	32	CASBNW01;GCA_949124935.1	2275	14.53	423.31	440.39	427	422	127.11	0.29	0.29	4.34	(304.19;62.43;70)	(353.11;71.47;101)			(573.79;112.91;68)	(480.91;101.94;66)	(412.3;73.57;69)	(517.84;92.6;62)	(358.06;55.78;66)	(498.6;93.47;70)	(492.03;78.5;88)	(440.29;61.44;95)	(496.39;160.53;51)	(342.43;89.27;81)	(487.25;99.0;64)	(635.88;138.86;58)	(439.54;107.75;81)	(386.76;77.24;87)			(362.7;59.89;64)	(495.83;75.17;58)	(461.61;88.48;64)	(581.6;108.85;60)	(326.37;77.52;70)	(381.56;84.88;75)	(368.01;81.19;73)	(680.0;93.53;58)	(388.08;71.47;91)	(497.0;141.2;71)	(498.25;84.3;61)	(550.13;135.07;69)	(ChrX_ChrII_Right;431.62;53.95;71)(ChrX_ChrII_Left;332.55;74.84;76)(ChrII_ChrX_Right;377.88;69.37;67)(ChrII_ChrX_Left;360.41;67.67;70)
AHG_Exp2	AHG-CBS1586	1	Domesticated	01. Wine European 1	31	SAMEA118252019;GCA_949124395.1	6330	13.87	310.68	359.28	356	360	78.61	0.22	0.5	5.69	(324.47;58.58;241)	(328.5;58.3;210)	(358.96;62.48;178)	(332.18;67.53;211)	(450.3;122.29;161)	(342.81;77.71;203)	(353.99;68.77;190)	(385.71;74.43;215)	(346.85;60.65;225)	(374.82;77.24;213)	(343.74;70.89;233)	(414.58;67.75;212)	(338.18;68.92;222)	(339.0;72.42;211)	(386.31;72.16;248)	(358.65;67.68;232)	(378.97;77.28;184)		(316.79;69.71;421)	(400.0;76.07;353)	(307.07;65.17;87)	(383.98;76.77;181)	(346.61;71.35;190)	(354.83;71.95;169)	(348.33;76.84;104)	(344.11;60.14;104)	(358.1;67.27;174)	(338.96;61.56;184)	(384.64;77.21;183)	(413.14;81.78;194)	(352.33;72.58;197)	(331.68;69.7;200)
W303_Exp1	W303	1	Laboratory	13. Lab-related	32	SAMEA118252020;GCA_965282845	1648	14.2	337.34	306.12	301	273	73.56	0.24	0.22	6.31	(285.45;62.33;58)	(311.39;63.63;46)	(350.02;72.45;59)	(285.95;42.99;42)	(440.98;116.84;40)	(287.67;68.72;60)	(291.59;60.35;61)	(302.76;42.48;62)	(318.9;63.84;67)	(312.81;52.44;48)	(303.71;56.54;72)	(286.1;72.45;68)	(314.15;58.35;39)	(284.41;72.09;59)	(297.39;73.93;61)	(276.62;62.29;63)	(307.57;58.75;14)	(381.78;94.85;55)	(344.43;55.31;30)	(261.33;50.95;67)	(299.96;55.3;49)	(267.98;67.61;51)	(287.96;53.19;57)	(279.25;81.69;16)	(322.98;67.35;47)	(337.41;70.15;63)	(295.46;77.18;46)	(302.68;63.55;66)	(307.85;52.09;40)	(325.96;74.07;55)	(293.33;54.52;45)	(270.1;39.31;42)
W303_Exp2	W303	1	Laboratory	13. Lab-related	32	SAMEA118252021;GCA_965282845	8776	18.92	337.34	328.84	320	303	79.28	0.24	1.02	7.06	(313.37;63.75;247)	(342.01;64.65;247)	(345.49;69.81;300)	(288.0;62.37;269)	(517.22;114.55;282)	(298.76;70.87;311)	(322.55;60.06;290)	(330.99;69.98;311)	(339.05;79.87;300)	(334.24;69.45;284)	(309.1;56.13;265)	(303.84;57.02;291)	(330.8;52.52;290)	(319.7;58.71;297)	(318.83;59.08;312)	(304.36;52.95;307)	(343.76;61.88;189)	(413.94;77.22;304)	(331.55;61.06;243)	(281.59;48.23;241)	(313.03;56.61;270)	(282.0;55.96;283)	(300.94;63.17;288)	(321.03;60.65;124)	(343.78;65.51;299)	(345.9;76.9;318)	(294.95;72.45;288)	(334.41;60.93;305)	(315.99;71.01;279)	(352.47;70.25;282)	(310.98;66.21;278)	(291.84;53.23;182)
yku80_Exp1	yku80∆	1	Laboratory	13. Lab-related	32	SAMEA118252022;GCA_965282845	3370	14.21	337.34	145.63	142	135	50.63	0.35	0.74	4.59	(150.41;45.37;132)	(143.56;44.02;91)	(139.46;43.88;122)	(144.65;57.2;77)	(132.96;51.42;132)	(123.58;61.41;130)	(165.86;46.92;123)	(152.61;41.85;132)	(155.92;55.43;115)	(154.36;52.08;91)	(147.35;55.86;103)	(147.48;50.14;139)	(142.64;42.31;139)	(156.96;52.85;73)	(166.83;53.37;109)	(136.01;44.93;148)	(166.71;54.91;24)	(168.75;49.29;116)	(187.86;40.66;22)	(128.3;48.17;119)	(129.98;47.45;149)	(144.71;45.66;121)	(135.43;40.96;129)	(155.64;83.65;11)	(143.95;50.61;129)	(142.99;48.16;156)	(126.8;53.52;80)	(148.33;47.68;142)	(132.81;52.55;83)	(162.44;43.43;132)	(149.36;48.21;87)	(121.79;42.09;14)
yku80_Exp2	yku80∆	1	Laboratory	13. Lab-related	32	SAMEA118252023;GCA_965282845	12418	18.82	337.34	155.82	151	137	59.42	0.38	2.52	5.59	(151.79;61.49;434)	(152.47;57.68;330)	(154.02;66.42;394)	(148.16;54.68;411)	(139.14;64.48;441)	(128.95;60.02;428)	(179.99;47.81;437)	(164.68;45.82;428)	(173.16;69.09;402)	(173.51;64.57;411)	(158.78;59.91;383)	(155.22;55.41;473)	(161.77;70.53;451)	(154.81;50.9;378)	(177.98;77.73;436)	(141.56;45.1;472)	(167.98;44.54;214)	(172.49;48.41;412)	(187.4;51.18;225)	(146.19;62.04;470)	(138.3;55.72;409)	(155.85;47.9;380)	(143.8;46.4;425)	(136.2;44.72;157)	(154.53;57.21;476)	(159.44;62.47;413)	(125.08;56.17;347)	(158.36;59.74;471)	(138.05;49.98;357)	(180.8;50.52;401)	(164.41;60.38;372)	(132.86;47.0;180)
yku80_Exp3	yku80∆	1	Laboratory	13. Lab-related	32	SAMEA118252024;GCA_965282845	5444	18.81	337.34	157.63	150	141	68.76	0.44	3.64	8.01	(152.82;59.25;159)	(146.03;57.13;127)	(150.71;58.72;233)	(156.1;80.08;152)	(149.86;96.43;197)	(125.25;45.1;202)	(183.41;48.89;187)	(161.46;51.66;208)	(175.74;69.18;225)	(170.77;73.38;164)	(155.55;60.76;186)	(158.72;48.44;185)	(170.35;96.17;203)	(151.39;43.91;166)	(165.62;59.06;174)	(138.17;51.01;185)	(204.76;110.93;80)	(188.29;62.0;195)	(198.01;85.36;88)	(140.52;72.28;212)	(136.5;51.31;192)	(153.66;70.48;208)	(153.26;59.55;197)	(136.71;43.77;48)	(159.74;65.55;195)	(157.46;50.65;197)	(129.7;81.99;175)	(157.51;57.95;199)	(140.81;61.9;135)	(181.51;72.3;166)	(172.49;92.83;145)	(138.93;47.59;59)
haploid_NA	YPB001 derived from AKN (YPS128)	1	Wild	20. American	32	SAMEA120513331;GCA_977064315	18920	19.29	294.44	359.58	357	350	74.34	0.21	0.19	5.7	(356.49;65.97;530)	(309.27;64.74;431)	(414.21;66.61;585)	(341.13;67.82;599)	(398.71;87.94;595)	(429.32;84.94;635)	(345.27;61.37;597)	(331.42;70.61;527)	(391.38;63.9;552)	(383.06;75.01;543)	(335.48;63.67;605)	(366.93;67.96;620)	(345.75;69.4;564)	(339.53;66.2;547)	(358.9;70.06;629)	(336.63;59.88;621)	(350.01;67.19;602)	(381.38;63.4;642)	(361.71;65.78;672)	(337.5;69.91;573)	(367.55;62.0;594)	(344.6;71.82;589)	(337.76;65.34;638)	(360.41;71.24;612)	(359.83;76.3;627)	(348.92;66.25;614)	(336.91;69.19;598)	(338.48;69.4;605)	(399.33;75.33;614)	(365.49;74.86;639)	(381.02;73.9;571)	(330.65;68.07;550)
diploid_NA	AKN (YPS128)	1	Wild	20. American	32	SAMEA120513332;GCA_977064315	16287	19.81	294.44	324.2	321	306	65.52	0.2	0.12	5.51	(313.42;53.49;597)	(292.79;54.64;342)	(324.76;53.16;538)	(303.47;51.63;494)	(367.08;72.13;569)	(312.0;60.09;597)	(389.88;74.59;491)	(298.51;59.44;487)	(325.77;61.31;529)	(302.91;59.19;448)	(305.95;52.73;593)	(343.13;57.57;575)	(297.45;62.51;475)	(327.01;65.89;421)	(327.16;60.25;530)	(311.37;59.98;509)	(332.25;58.33;516)	(319.86;63.27;555)	(344.79;60.83;498)	(307.64;54.49;436)	(337.1;54.83;532)	(305.77;51.84;520)	(318.57;54.22;553)	(334.08;70.97;503)	(331.71;67.02;479)	(304.57;52.91;495)	(312.03;64.47;468)	(400.9;74.36;499)	(342.1;64.36;499)	(319.8;65.83;502)	(309.18;57.2;510)	(297.61;61.53;527)
tetraploid_NA	YPB020 derived from AKN (YPS128)	1	Wild	20. American	32	SAMEA120513334;GCA_977064315	14942	20.34	294.44	390.73	386	376	82.64	0.21	0.23	5.58	(401.46;70.32;451)	(331.35;70.47;310)	(446.66;87.91;492)	(371.1;66.95;480)	(485.24;122.82;463)	(437.0;104.21;528)	(407.77;67.93;487)	(358.99;69.62;476)	(367.91;62.91;502)	(365.79;63.31;417)	(360.82;64.71;531)	(417.83;76.36;506)	(405.22;77.9;459)	(352.68;74.46;461)	(395.05;70.31;480)	(365.88;71.86;493)	(398.86;70.11;462)	(378.13;67.7;484)	(396.95;65.95;477)	(374.13;79.62;429)	(411.92;70.25;451)	(393.58;75.57;492)	(349.45;73.08;449)	(410.78;80.94;481)	(389.78;73.6;432)	(378.22;76.72;448)	(373.81;68.03;520)	(404.23;78.51;470)	(417.74;86.51;461)	(395.25;74.06;485)	(392.21;85.73;452)	(334.55;66.21;413)
haploid_WA	YPB002 derived from AKI (DBVPG6044)	1	Domesticated	19. African palm wine	32	SAMEA120513335;GCA_977064335	11786	20.2	432.09	386.7	387	381	81.98	0.21	-0.54	6.25	(388.67;71.33;271)	(425.29;58.2;319)	(446.31;92.9;355)	(345.31;62.38;410)	(417.37;68.31;374)	(378.28;64.18;352)	(379.99;56.36;366)	(330.49;57.08;374)	(372.02;82.64;403)	(388.15;63.99;365)	(313.73;83.12;381)	(407.84;67.61;399)	(364.58;53.84;380)	(353.55;70.59;370)	(390.76;69.59;386)	(428.3;64.22;370)	(395.43;90.93;311)	(427.83;103.26;411)	(356.91;69.78;341)	(450.81;69.94;355)	(342.0;100.17;375)	(391.51;58.4;397)	(335.51;54.6;404)	(392.38;82.33;420)	(480.87;74.08;388)	(347.93;57.85;383)	(392.51;71.89;347)	(361.98;66.11;364)	(373.46;80.8;340)	(423.68;83.33;354)	(421.62;72.71;339)	(366.31;61.97;382)
diploid_WA	AKI (DBVPG6044)	1	Domesticated	19. African palm wine	32	SAMEA120513336;GCA_977064335	13962	20.08	432.09	415.3	408	397	95.69	0.23	0.15	7.44	(454.67;89.32;323)	(407.14;70.54;400)	(416.34;82.07;440)	(369.37;69.81;462)	(619.65;133.59;440)	(399.81;70.1;475)	(385.48;68.97;453)	(364.05;64.07;463)	(447.52;127.56;480)	(416.12;64.46;468)	(361.97;62.39;449)	(379.19;61.12;377)	(395.64;71.52;420)	(390.27;85.96;454)	(398.82;64.67;456)	(410.74;71.81;457)	(428.39;96.64;418)	(432.97;93.35;456)	(411.27;83.25;421)	(406.2;76.43;408)	(361.65;97.43;445)	(433.64;68.37;471)	(376.0;61.94;471)	(436.61;91.88;438)	(411.76;67.64;460)	(376.95;63.22;418)	(414.24;77.16;453)	(378.38;72.39;465)	(431.51;90.4;408)	(461.21;101.47;414)	(525.59;98.07;393)	(414.13;63.93;406)
tetraploid_WA	YPB024 derived from AKI (DBVPG6044)	1	Domesticated	19. African palm wine	32	SAMEA120513337;GCA_977064335	11596	19.36	432.09	453.2	446	437	97.86	0.22	0.05	6.96	(493.74;86.84;314)	(486.75;92.12;336)	(424.65;94.45;345)	(400.03;76.21;403)	(580.48;110.87;394)	(408.27;58.28;368)	(418.17;78.75;335)	(411.73;59.48;365)	(468.89;91.89;381)	(440.49;64.14;380)	(399.1;81.11;335)	(412.8;74.1;376)	(442.12;66.0;389)	(407.86;76.53;411)	(432.74;74.55;402)	(444.24;72.56;369)	(498.41;94.02;324)	(493.82;117.52;375)	(436.02;73.88;323)	(486.78;86.65;354)	(450.41;150.43;382)	(470.76;72.51;412)	(411.34;58.42;399)	(471.93;107.8;355)	(531.29;96.24;367)	(400.02;70.97;378)	(433.4;62.44;331)	(406.91;76.28;373)	(548.86;121.9;302)	(502.08;97.08;305)	(486.49;89.78;333)	(440.73;69.89;380)

## Sheet: Legend
Supplemental Table S1. List of strains and accessions.
Summary table of all strains used in this work. Relevant sequencing statistics and TL distribution metrics are indicated.
